# Supplementary material for: Comprehensive analysis of ferroptosis-related genes reveals potential therapeutic targets in osteoporosis patients: a computational analysis and in vitro experiments
Source: Front Genet. 2025 Jan 10;15:1522809. doi: 10.3389/fgene.2024.1522809 (PMC11757248; doi:10.3389/fgene.2024.1522809)
Supplement: Supplementary file 6 [file Table5.xlsx]

## Sheet: 442-unregulated genes
symbol	hgncid	ensgstable	function
RPL8	HGNC:10368	ENSG00000161016	Required in erastin-induced ferroptosis. Silencing of it conferred against erastin-induced ferroptosis.
IREB2	HGNC:6115	ENSG00000136381	Required in erastin-induced ferroptosis. Silencing of it conferred against erastin-induced ferroptosis.
IREB2	HGNC:6115	ENSG00000136381	The gene targets of the enriched shRNAs are potential genes that positively regulate ferroptosis.
IREB2	HGNC:6115	ENSG00000136381	Further studies have found that ART could lead to the accumulation of IRP 2 a in hepatic stellate cell by inhibiting the ubiquitination of it, thus inducing the increase of iron in HSC (hepatic stellate cell), which could product a large number of ROS (reactive oxide species), resulting the occurrence of ferroptosis in cells.
IREB2	HGNC:6115	ENSG00000136381	IRP2 Silencing Attenuated Hemin-Induced Ferroptosis in Primary Neurons in vitro.
IREB2	HGNC:6115	ENSG00000136381	IRP2 activation increases intracellular Fe+2 pool and sensitize cells to ferroptosis.
ATP5MC3	HGNC:843	ENSG00000154518	Required in erastin-induced ferroptosis. Silencing of it conferred against erastin-induced ferroptosis.
CS	HGNC:2422	ENSG00000062485	Required in erastin-induced ferroptosis. Silencing of it conferred against erastin-induced ferroptosis.
EMC2	HGNC:28963	ENSG00000104412	Required in erastin-induced ferroptosis. Silencing of it conferred against erastin-induced ferroptosis.
NOX1	HGNC:7889	ENSG00000007952	Suppresses erastin-induced ferroptosis when inhibited by inhibitor.
NOX3	HGNC:7890	ENSG00000074771	Suppresses erastin-induced ferroptosis when inhibited by inhibitor.
NOX4	HGNC:7891	ENSG00000086991	Suppresses erastin-induced ferroptosis when inhibited by inhibitor.
NOX4	HGNC:7891	ENSG00000086991	Inhibition of NADPH oxidase 4 (NOX4) blocked ferroptosis.
NOX4	HGNC:7891	ENSG00000086991	Activated Nox4 contributes to PAB-induced ferroptotic cell death. knockdown made cells resistant to PAB-induced death.
NOX4	HGNC:7891	ENSG00000086991	Knockdown inhibited ferroptosis.
NOX4	HGNC:7891	ENSG00000086991	NOX4 promotes ferroptosis by oxidative stress-induced lipid peroxidation in human astrocytes.
DUOX2	HGNC:13273	ENSG00000140279	Suppresses erastin-induced ferroptosis when inhibited by inhibitor.
VDAC2	HGNC:12672	ENSG00000165637	Required in erastin-induced ferroptosis.
PIK3CA	HGNC:8975	ENSG00000121879	Inhibitor blocked ferroptotic cell death.
FLT3	HGNC:3765	ENSG00000122025	Inhibitor blocked ferroptotic cell death.
SCP2	HGNC:10606	ENSG00000116171	SCP-2 inhibitors showed anti-ferroptotic activity, which was substantiated by knocking down SCP-2 in Gpx4鈭?鈭?cells.
ACSL4	HGNC:3571	ENSG00000068366	Deletion of this gene likely suppress ferroptosis by limiting the membrane-resident pool of oxidation-sensitive fatty acids.
ACSL4	HGNC:3571	ENSG00000068366	Knockdown inhibited erastin-induced ferroptosis, whereas overexpression restored ferroptosis sensitization.
ACSL4	HGNC:3571	ENSG00000068366	Inhibition of ACSL4 was effective in protecting against RSL3-induced cell death. Acsl4 KO cells are resistant to ferroptosis.
ACSL4	HGNC:3571	ENSG00000068366	An essential proferroptotic gene. Re-expression of Flag-tagged human wild-type (WT) ACSL4 (ACSL4-Flag) in Acsl4 KO Pfa1 cells restored full sensitivity to ferroptosis induction. Inhibition showed significantly prolonged survival compared to vehicle-treated mice.
ACSL4	HGNC:3571	ENSG00000068366	Knockout of Acsl4 in ferroptosis-sensitive cells conferred protection from erastin- and RSL3-induced cell death.
ACSL4	HGNC:3571	ENSG00000068366	Inhibition suppresses ferroptosis.
ACSL4	HGNC:3571	ENSG00000068366	Required for ferroptosis induced by erastin. ACSL4-null cells are resistant to ferroptosis induced by either erastin.
ACSL4	HGNC:3571	ENSG00000068366	Overexpression induced ferroptosis. The opposite results were observed when ACSL4 was silenced.
ACSL4	HGNC:3571	ENSG00000068366	Inhibition of ACSL4 attenuates ferroptotic damage after pulmonary ischemia-reperfusion.
ACSL4	HGNC:3571	ENSG00000068366	_NA_
ACSL4	HGNC:3571	ENSG00000068366	Inhibition of ACSL4 suppresses ferroptosis, inflammation and lipid accumulation triggered by arsenic.
ACSL4	HGNC:3571	ENSG00000068366	Knockdown of ACSL4 expression by specific siRNA/sgRNA significantly attenuated sorafenib-induced lipid peroxidation and ferroptosis in Huh7 cells, and also rescued sorafenib_x0002_induced inhibition of xenograft tumor growth in vivo.
ACSL4	HGNC:3571	ENSG00000068366	ACSL4 suppresses glioma cells proliferation via activating ferroptosis.
ACSL4	HGNC:3571	ENSG00000068366	ACSL4 promotes postischemic neuronal ferroptosis.
ACSL4	HGNC:3571	ENSG00000068366	ACSL4 positively regulated ferroptosis in lung adenocarcinoma.
ACSL4	HGNC:3571	ENSG00000068366	Inhibition of Acyl-CoA Synthetase Long-Chain Family Member 4 Suppresses Ferroptosis After Stroke.
ACSL4	HGNC:3571	ENSG00000068366	Downregulation of ACSL4 inhibited sev-induced ferroptosis.
NRAS	HGNC:7989	ENSG00000213281	NRAS12V mutant protects RMS13 cells from ferroptotic cell death.
KRAS	HGNC:6407	ENSG00000133703	KRAS12V mutant protects RMS13 cells from ferroptotic cell death.
HRAS	HGNC:5173	ENSG00000174775	HRAS12V mutant protects RMS13 cells from ferroptotic cell death.
TFRC	HGNC:11763	ENSG00000072274	RNAi of transferrin receptor (TfR) inhibited ferroptosis.
TFRC	HGNC:11763	ENSG00000072274	The gene targets of the enriched shRNAs are potential genes that positively regulate ferroptosis.
TFRC	HGNC:11763	ENSG00000072274	Knockdown of TFRC suppresses CP depletion-enhanced ferroptosis.
TFRC	HGNC:11763	ENSG00000072274	In conclusion, TFRC increased the iron content, mediated the release of ROS, activated mitophagy, and induced lipid peroxidation, which further promoted the ferroptosis of KGN cells.
TFR2	HGNC:11762	ENSG00000106327	RNAi of transferrin receptor (TfR) inhibited ferroptosis.
SLC38A1	HGNC:13447	ENSG00000111371	RNAi knockdown markedly blocked ferroptosis.
SLC38A1	HGNC:13447	ENSG00000111371	The gene targets of the enriched shRNAs are potential genes that positively regulate ferroptosis.
SLC38A1	HGNC:13447	ENSG00000111371	Mechanistically, silencing of lncRNA ZFAS1 attenuated ferroptosis and PF progression by lncRNA ZFAS1 acting as a competing endogenous RNA (ceRNA) and sponging miR-150-5p to downregulate SLC38A1 expression.
GLS2	HGNC:29570	ENSG00000135423	Both inhibitor inhibition and gene knockdown inhibit ferroptotic cell death.
GLS2	HGNC:29570	ENSG00000135423	Upregulated in erastin-treated wild-type MEFs, and silencing Gls2 exihibits cell death defect in wild-type MEFs treated with erastin.
GLS2	HGNC:29570	ENSG00000135423	The gene targets of the enriched shRNAs are potential genes that positively regulate ferroptosis.
GOT1	HGNC:4432	ENSG00000120053	RNAi reduced ferroptosis.
GOT1	HGNC:4432	ENSG00000120053	Overexpression of miR鈥? suppressed GOT1, which subsequently reduced ferroptosis. Overexpression of GOT1 restored miR鈥? mediated ferroptosis suppression.
CARS1	HGNC:1493	ENSG00000110619	Required for ferroptosis in diverse cell contexts. Knockdown of CARS inhibited erastin-induced death by preventing the induction of lipid reactive oxygen species, without altering iron homeostasis.
KEAP1	HGNC:23177	ENSG00000079999	Knockdown of Keap1 reversed loss of p62-increased degradation of NRF2 in ferroptosis. Keap1 knockdown led to resistance to erastin-induced and sorafenib-induced growth inhibition with decreased ferroptotic events in the absence or presence of p62 knockdown.
KEAP1	HGNC:23177	ENSG00000079999	Keap 1 silencing decreased ferroptosis.
KEAP1	HGNC:23177	ENSG00000079999	Keap1 inhibition promotes resistance to ferroptosis.
KEAP1	HGNC:23177	ENSG00000079999	_NA_
HMOX1	HGNC:5013	ENSG00000100292	Zinc protoporphyrin IX, a HO-1 inhibitor, prevented Erastin-triggered ferroptotic cancer cell death. Overexpression accelerates erastin-induced cell death.
HMOX1	HGNC:5013	ENSG00000100292	Inhibiting HO-1 effectively attenuated BAY-induced ferroptotic cell death. Defective HO-1 expression significantly rescued cell survival suppressed by BAY.
HMOX1	HGNC:5013	ENSG00000100292	Enhances the ferroptotic process in PRDX6-silenced cells by promoting cellular accumulation of ferrous ions. Overexpression increases both erastin and RSL-3-induced lipid ROS.
HMOX1	HGNC:5013	ENSG00000100292	Excessive activation of HO-1 via Nrf2鈥揝LC7A11鈥揌O-1 hierarchy contributes to RPE ferroptosis.
HMOX1	HGNC:5013	ENSG00000100292	HMOX1 upregulation promotes ferroptosis in diabetic atherosclerosis.
HMOX1	HGNC:5013	ENSG00000100292	Finally, inhibition or induction of Hmox1 decreased or increased cardiac ferroptosis in SCD mice, respectively.
ATG5	HGNC:589	ENSG00000057663	Knockout or knockdown limited erastin-induced ferroptosis.
ATG5	HGNC:589	ENSG00000057663	Potential positive regulators of ferroptosis. Knockout of ATG5 led to significantly lower levels of erastin-induced ferroptosis in a dose- and time-dependent manner.
NCOA4	HGNC:7671	ENSG00000266412	Inhibition suppressed ferroptosis, and overexpression promoted ferroptosis.
NCOA4	HGNC:7671	ENSG00000266412	Elimination of NCOA4 expression by RNAi knockdown significantly block ferroptosis
NCOA4	HGNC:7671	ENSG00000266412	Additionally, NCOA4 expression was inhibited, which reduced degradation of ferritin and suppressed ferroptosis.
NCOA4	HGNC:7671	ENSG00000266412	Both in vivo and in vitro, NCOA4 deletion notably abrogated ferritinophagy caused by I/R injury and thus inhibited ferroptosis.
ALOX12	HGNC:429	ENSG00000108839	Silencing ALOX genes made cells resistant to ferroptosis.
ALOX12	HGNC:429	ENSG00000108839	12鈥怢OX inhibitors prevented cell death, whereas ALOX12 overexpression significantly enhanced cell death. ALOX12 expression was gradually elevated during the erastin or RSL3 treatments, and was stable in the late stage of ferroptosis.
ALOX12	HGNC:429	ENSG00000108839	An essential factor of p53-dependent ferroptosis. Loss of one Alox12 allele is sufficient to abrogate p53-mediated ferroptosis.
ALOX12	HGNC:429	ENSG00000108839	Hydrogen sulfide guards myoblasts from ferroptosis by inhibiting ALOX12 acetylation.
ALOX12B	HGNC:430	ENSG00000179477	Silencing ALOX genes made cells resistant to ferroptosis.
ALOX15	HGNC:433	ENSG00000161905	Silencing ALOX genes made cells resistant to ferroptosis.
ALOX15	HGNC:433	ENSG00000161905	SAT1- and ROS-induced ferroptosis was completely abrogated by PD146176, an ALOX15-specific inhibitor.
ALOX15	HGNC:433	ENSG00000161905	Liproxstatin-1 inhibited the 15-LOX enzymatic activity and suppressed ferroptosis.
ALOX15	HGNC:433	ENSG00000161905	Suppression of ferroptosis following ALOX15 silencing was detected in cancer cells. Cells with exogenous expression of ALOX15 had an increased cell death rate following RSL3 treatment.
ALOX15	HGNC:433	ENSG00000161905	Indeed, knocking down (KD) of 15-LOX in M2 RAW 264.7 macrophages and EOC 20 cells resulted in significantly reduced sensitivity to ferroptosis triggered by RSL3 (Figs. 1e,f and supplementary Fig. 1e, f).
ALOX15B	HGNC:434	ENSG00000179593	Silencing ALOX genes made cells resistant to ferroptosis. Erastin-induced cell death was rescued by silencing either ALOX15B or ALOXE3, which supported the hypothesis that lipoxygenases are required for ferroptosis.
ALOXE3	HGNC:13743	ENSG00000179148	Silencing ALOX genes made cells resistant to ferroptosis. Erastin-induced cell death was rescued by silencing either ALOX15B or ALOXE3, which supported the hypothesis that lipoxygenases are required for ferroptosis.
ALOXE3	HGNC:13743	ENSG00000179148	ALOXE3 knockdown renders GBM cells resistant to p53-induced ferroptosis.
PHKG2	HGNC:8931	ENSG00000156873	U-2-OS cells became resistant to erastin upon PHKG2 silencing. Erastin-treated HT-1080 cells were rescued by shPHKG2.
G6PDX	_NA_	_NA_	The gene targets of the enriched shRNAs are potential genes that positively regulate ferroptosis.
ATG3	HGNC:20962	ENSG00000144848	Potential positive regulators of ferroptosis. Knockout of ATG3 greatly reduced the sensitivity of MEFs to ferropotosis, and reconstituting ATG3 back to these cells restored the ferroptosis sensitivity.
ATG4D	HGNC:20789	ENSG00000130734	Potential positive regulators of ferroptosis.
BECN1	HGNC:1034	ENSG00000126581	Potential positive regulators of ferroptosis.
BECN1	HGNC:1034	ENSG00000126581	Knockdown inhibits ferroptosis. Overexpression increases ferroptotic cancer cell death.
BECN1	HGNC:1034	ENSG00000126581	Overexpression aggravated isoflurane-induced cell damage by upregulating ferroptosis. This phenomenon was significantly attenuated by silencing of Beclin1.
BECN1	HGNC:1034	ENSG00000126581	Beclin1 haploinsufficiency rescues low ambient temperature-induced cardiac remodeling and contractile dysfunction through inhibition of ferroptosis and mitochondrial injury.
GABARAPL2	HGNC:13291	ENSG00000034713	Potential positive regulators of ferroptosis.
GABARAPL1	HGNC:4068	ENSG00000139112	Potential positive regulators of ferroptosis.
ATG16L1	HGNC:21498	ENSG00000085978	Potential positive regulators of ferroptosis.
WIPI1	HGNC:25471	ENSG00000070540	Potential positive regulators of ferroptosis.
WIPI2	HGNC:32225	ENSG00000157954	Potential positive regulators of ferroptosis.
SNX4	HGNC:11175	ENSG00000114520	Potential positive regulators of ferroptosis.
ULK2	HGNC:13480	ENSG00000083290	Knockout of ULK2 led to significantly lower levels of erastin-induced ferroptosis in a dose- and time-dependent manner.
SAT1	HGNC:10540	ENSG00000130066	p53-mediated activation of SAT1 contributes to ferroptotic cell death in the presence of ROS stress. Knockdown of Sat1 partially rescued ROS-induced ferroptosis.
BID	HGNC:1050	ENSG00000015475	BID deletion prevents erastin- and glutamate-induced cell death. BID inhibition inhibited erastin-induced ferroptosis.
ZEB1	HGNC:11642	ENSG00000148516	Knockout of ZEB1 prevents cell death induced by GPX4 inhibition.
ZEB1	HGNC:11642	ENSG00000148516	CDH1 silencing or ZEB1 overexpression increased the susceptibility to ferroptosis, whereas CDH overexpression or ZEB1 silencing decreased the susceptibility, in vitro and in vivo.
DPP4	HGNC:3009	ENSG00000197635	Required for ferroptosis in TP53-deficient CRC cells.
PEBP1	HGNC:8630	ENSG00000089220	Elevated levels of PEBP1 resulted in increased sensitivity of HK2 cells to RSL3 whereas lowered contents of PEBP1 in HAEC and HT22 cells were associated with decreased sensitivity to ferroptosis.
PEBP1	HGNC:8630	ENSG00000089220	We found that PEBP1 KO HT22 cells demonstrated very high resistance to RSL3-induced ferroptosis compared with wild-type control cells.
CDO1	HGNC:1795	ENSG00000129596	CDO1 suppression contributes to ferroptosis resistance.
MYB	HGNC:7545	ENSG00000118513	Erastin-induced ferroptosis was restrained when c-Myb was suppressed.
MAPK8	HGNC:6881	ENSG00000107643	JNK1/2 inhibitors inhibited t-BHP-induced ferroptosis. t-BHP treatment significantly increased the protein expression of p-JNK.
MAPK8	HGNC:6881	ENSG00000107643	Knockdown of JNK results in loss of SAS鈥慽nduced cell proliferation inhibition and cell death.
MAPK9	HGNC:6886	ENSG00000050748	JNK1/2 inhibitors inhibited t-BHP-induced ferroptosis. t-BHP treatment significantly increased the protein expression of p-JNK.
CHAC1	HGNC:28680	ENSG00000128965	CHAC1 degradation of GSH might enhance cystine-starvation-induced cell death.
CHAC1	HGNC:28680	ENSG00000128965	CHAC1 promotes ferroptosis.
LINC00472	HGNC:21380	ENSG00000233237	Increases erastin-induced growth inhibition, whereas depletion of P53RRA decreased erastin-induced growth inhibition.
PRKAA2	HGNC:9377	ENSG00000162409	Inhibition of PRKAA/AMPKalpha diminishes ferroptosis.
PRKAA2	HGNC:9377	ENSG00000162409	Suppression of AMPK impairs SIRT3鈥恊nhanced ferroptosis.
PRKAA1	HGNC:9376	ENSG00000132356	Inhibition of PRKAA/AMPKalpha diminishes ferroptosis.
ELAVL1	HGNC:3312	ENSG00000066044	ELAVL1 siRNA led to ferroptosis resistance, whereas ELAVL1 plasmid contributed to classical ferroptotic events.
ELAVL1	HGNC:3312	ENSG00000066044	Knockdown of ELAVL1 suppresses ferroptosis and H/R injury.
MIR6852	HGNC:49993	ENSG00000284195	Promotes ferroptosis. Binds to LINC0033 and serves as a negative upstream regulator of CBS-mediated ferroptosis inhibition.
ACVR1B	HGNC:172	ENSG00000135503	Inhibition attenuated erastin-induced ferroptosis.
TGFBR1	HGNC:11772	ENSG00000106799	Inhibition attenuated erastin-induced ferroptosis.
HILPDA	HGNC:28859	ENSG00000135245	Promotes ferroptosis sensitivity downstream of HIF-2alpha.
HIF1A	HGNC:4910	ENSG00000100644	Re-sensitized HIF-2alpha-null cells to ferroptosis. Induce ferroptosis sensitivity in cancer cells.
IFNG	HGNC:5438	ENSG00000111537	Interferon gamma released from CD8+ T cells downregulates the expression of SLC3A2 and SLC7A11, and as a consequence, promotes tumour cell lipid peroxidation and ferroptosis.
IFNG	HGNC:5438	ENSG00000111537	IFN纬 sensitized tumor cells to ferroptosis in vitro.
IFNG	HGNC:5438	ENSG00000111537	Interferon-纬 induces retinal pigment epithelial cell Ferroptosis by a JAK1-2/STAT1/SLC7A11 signaling pathway in Age-related Macular Degeneration.
ANO6	HGNC:25240	ENSG00000177119	Essential for ferroptosis. Inhibition blocked ferroptotic cell death induced by RSL3/erastin.
LPIN1	HGNC:13345	ENSG00000134324	Overexpression of adipose lipin鈥? in mice facilitated the onset of hepatic ferroptosis.
HMGB1	HGNC:4983	ENSG00000189403	Required for erastin-induced ferroptosis. Knockdown of HMGB1 decreased erastin-induced cell death.
HMGB1	HGNC:4983	ENSG00000189403	Collectively, these data revealed the suppression of HMGB1 prevents against glucose-induced ferroptosis in mesangial cells.
TLR4	HGNC:11850	ENSG00000136869	Knockdown inhibited ferroptosis.
TLR4	HGNC:11850	ENSG00000136869	Inhibition of TLR4 prevents the activation of ferroptosis following HIBD.
ATF3	HGNC:785	ENSG00000162772	Promotes ferroptosis induced by erastin.
ATF3	HGNC:785	ENSG00000162772	However, ATF3 elevated ferroptosis in SGC7901/DDP and BGC823/DDP cells.
ATF3	HGNC:785	ENSG00000162772	Taken together, ATF3 contributes to brucine-induced glioma cell ferroptosis via increasing H2O2 and iron.
ATM	HGNC:795	ENSG00000149311	Essential for ferroptosis. Genetic knockdown and chemical inhibition of ATM both suppress ferroptotic cell death.
ATM	HGNC:795	ENSG00000149311	Taken together, we found ATM inhibition protects against ferroptosis by reducing the labile iron pool.
YY1AP1	HGNC:30935	ENSG00000163374	Makes cells more sensitive to ferroptosis. Cells lacking YAP were no longer sensitised to ferroptosis.
EGLN2	HGNC:14660	ENSG00000269858	Inhibiting EGLN2 activation diminished ferroptotic tumor cell death.
MIOX	HGNC:14522	ENSG00000100253	Overexpression exacerbates cell death, knockdown inhibits ferroptosis.
TAFAZZIN	HGNC:11577	ENSG00000102125	TAZ removal confers ferroptosis resistance, whereas overexpression of TAZS89A sensitizes cells to ferroptosis.
TAFAZZIN	HGNC:11577	ENSG00000102125	TAZ removal confers ferroptosis resistance, while TAZS89A overexpression sensitizes cells to ferroptosis.
MTDH	HGNC:29608	ENSG00000147649	Can enhance sensitivity to inducers of ferroptosis. Enhances the vulnerability of cancer cells to ferroptosis.
IDH1	HGNC:5382	ENSG00000138413	Deletion of the mutant IDH1 allele or pharmacological inhibition of mutant IDH1 confers resistance to erastin-induced ferroptosis. Ectopic expression of mutant IDH1 promotes ferroptosis.
SIRT1	HGNC:14929	ENSG00000096717	Knockout partially mitigates ferroptosis.
SIRT1	HGNC:14929	ENSG00000096717	Histone deacetylase SIRT1 gene silencing or pharmacological inhibition by EX-527 suppressed EMT and consequently decreased ferroptosis, whereas SIRT inducers, resveratrol and SRT1720, increased ferroptosis.
SIRT1	HGNC:14929	ENSG00000096717	Intestinal SIRT1 Deficiency Inhibits Hepatic Ferroptosis in Ethanol-Administrated Mice.
FBXW7	HGNC:16712	ENSG00000109670	FBXW7 plasmid induces ferroptosis.
FBXW7	HGNC:16712	ENSG00000109670	Results revealed that FBW7 regulated lipid peroxidation and promoted ferroptosis, a non-apoptotic form of cell death.
DNAJB6	HGNC:14888	ENSG00000105993	Promotes ferroptosis in esophageal squamous cell carcinoma.
DNAJB6	HGNC:14888	ENSG00000105993	DNAJB6 Promotes Ferroptosis in Esophageal Squamous Cell Carcinoma.
BACH1	HGNC:935	ENSG00000156273	Promotes ferroptosis by repressing the transcription of a subset of the erastin-induced protective genes.
BACH1	HGNC:935	ENSG00000156273	These results showed that BACH1 promoted ferroptosis in MEFs.
CD82	HGNC:6210	ENSG00000085117	This study identified that the high expression of the KAI1 gene promoted the occurrence of ferroptosis in PC cells through its extensive effect on FPN and GPX4.
IL1B	HGNC:5992	ENSG00000125538	We observed that both IL-1尾 and FAC induced reactive oxygen species (ROS), and lipid ROS accumulation and ferroptosis related protein expression changes in chondrocytes. Ferrostatin-1, a ferroptosis specific inhibitor, attenuated the cytotoxicity, ROS and lipid-ROS accumulation and ferroptosis related protein expression changes induced by IL-1尾 and FAC and facilitated the activation of Nrf2 antio…
CTSB	HGNC:2527	ENSG00000164733	Cathepsin B is an executioner of ferroptosis
CTSB	HGNC:2527	ENSG00000164733	Mechanistically, nuclear CTSB accumulation causes DNA damage and subsequent activation of the stimulator of interferon response CGAMP interactor 1 (STING1/STING)-dependent DNA sensor pathway, which ultimately leads to autophagy-dependent ferroptosis.
POR	HGNC:9208	ENSG00000127948	The oxidoreductases POR and CYB5R1 are required for ferroptosis. Knockdown of POR in vivo protects ConA-induced ferroptotic liver damage
POR	HGNC:9208	ENSG00000127948	These data indicate that POR is a key enzyme involved in the execution of ML210/RSL3-induced ferroptotic cell death in melanoma and ccRCC cells.
CYB5R1	HGNC:13397	ENSG00000159348	The oxidoreductases POR and CYB5R1 are required for ferroptosis. Genetic knockout of POR and CYB5R1 decreases cellular hydrogen peroxide generation, preventing lipid peroxidation and ferroptosis.
ELOVL5	HGNC:21308	ENSG00000012660	Biochemical and lipidomics analyses support the hypothesis that ELOVL5 and FADS1 are required to maintain intracellular levels of AA and AdA and promote ferroptosis.
FADS1	HGNC:3574	ENSG00000149485	Biochemical and lipidomics analyses support the hypothesis that ELOVL5 and FADS1 are required to maintain intracellular levels of AA and AdA and promote ferroptosis.
PTEN	HGNC:9588	ENSG00000171862	Notably, we found that cancer cells carrying PIK3CA activating mutation or PTEN deletion appeared to be more resistant to RSL3. These mutations lead to the activation of the oncogenic PI3K-AKT signaling pathway. Therefore, sustained activation of the PI3K-AKT-mTOR pathway protects cancer cells from ferroptotic cell death.
NR1D2	HGNC:7963	ENSG00000174738	Targeted inhibition of Rev-erb-伪/尾 limits ferroptosis to ameliorate folic acid-induced AKI in mice.
IL6	HGNC:6018	ENSG00000136244	IL-6 exposure caused cartilage cell ferroptosis by inducing cellular oxidative stress and disturbing iron homeostasis. Overexpressing miR-10a-5p suppressed IL-6R expression, and partially abolished IL-6-induced ferroptosis.
IL6	HGNC:6018	ENSG00000136244	Interleukin-6 promotes ferroptosis in bronchial epithelial cells by inducing reactive oxygen species-dependent lipid peroxidation and disrupting iron homeostasis.
USP7	HGNC:12630	ENSG00000187555	USP7 promotes ferroptosis in the I/R-treated hearts via activation of p53/TfR1 pathway.
miR-182-5p	_NA_	_NA_	In conclusion, we demonstrated that I/R induced upregulation of miR-182-5p and miR-378a-3p, leading to activation of ferroptosis in renal injury through downregulation of GPX4 and SLC7A11.
miR-378a-3p	_NA_	_NA_	In conclusion, we demonstrated that I/R induced upregulation of miR-182-5p and miR-378a-3p, leading to activation of ferroptosis in renal injury through downregulation of GPX4 and SLC7A11.
ATF4	HGNC:786	ENSG00000128272	We identify ATF4 as differentially expressed in P47 and S47 cells and show that ATF4 can reverse the redox status and rescue metabolism of S47 cells, as well as increase sensitivity to ferroptosis.
AQP3	HGNC:636	ENSG00000165272	Further, we observed that aquaporin (AQP) 3, 5, and 8 bind nicotinamide-adenine dinucleotide phosphate oxidase 2 and regulate the permeability of extracellular H2O2, thereby contributing to ferroptosis.
AQP8	HGNC:642	ENSG00000103375	Further, we observed that aquaporin (AQP) 3, 5, and 8 bind nicotinamide-adenine dinucleotide phosphate oxidase 2 and regulate the permeability of extracellular H2O2, thereby contributing to ferroptosis.
LINC00618	HGNC:20110	ENSG00000225163	LINC00618 also accelerates ferroptosis by increasing the levels of lipid reactive oxygen species (ROS) and iron, two surrogate markers of ferroptosis, and decreasing the expression of solute carrier family 7 member 11 (SLC7A11)
MT1DP	HGNC:7396	ENSG00000205361	We found that ectopic expression of MT1DP sensitized A549 and H1299 cells to erastin-induced ferroptosis through downregulation of NRF2.
PEX10	HGNC:8851	ENSG00000157911	Genome-wide CRISPR screens identify peroxisome components as contributors to ferroptosis susceptibility.
AGPAT3	HGNC:326	ENSG00000160216	_NA_
PEX12	HGNC:8854	ENSG00000108733	Genome-wide CRISPR screens identify peroxisome components as contributors to ferroptosis susceptibility.
GPAT4	HGNC:20880	ENSG00000158669	_NA_
BRPF1	HGNC:14255	ENSG00000156983	_NA_
OSBPL9	HGNC:16386	ENSG00000117859	_NA_
INTS2	HGNC:29241	ENSG00000108506	_NA_
MMD	HGNC:7153	ENSG00000108960	_NA_
CYP4F8	HGNC:2648	ENSG00000186526	_NA_
MLLT1	HGNC:7134	ENSG00000130382	_NA_
GRIA3	HGNC:4573	ENSG00000125675	_NA_
EPT1	_NA_	_NA_	_NA_
LIG3	HGNC:6600	ENSG00000005156	_NA_
AEBP2	HGNC:24051	ENSG00000139154	_NA_
AGPS	HGNC:327	ENSG00000018510	Genome-wide CRISPR screens identify peroxisome components as contributors to ferroptosis susceptibility.
CDCA3	HGNC:14624	ENSG00000111665	_NA_
PEX2	HGNC:9717	ENSG00000164751	Genome-wide CRISPR screens identify peroxisome components as contributors to ferroptosis susceptibility.
TIMM9	HGNC:11819	ENSG00000100575	_NA_
DCAF7	HGNC:30915	ENSG00000136485	_NA_
LCE2C	HGNC:29460	ENSG00000187180	_NA_
FAR1	HGNC:26222	ENSG00000197601	Genome-wide CRISPR screens identify peroxisome components as contributors to ferroptosis susceptibility.
FAR1	HGNC:26222	ENSG00000197601	Inactivation of FAR1 diminishes SFA-dependent ferroptosis.
PHF21A	HGNC:24156	ENSG00000135365	_NA_
LYRM1	HGNC:25074	ENSG00000102897	_NA_
PEX3	HGNC:8858	ENSG00000034693	Genome-wide CRISPR screens identify peroxisome components as contributors to ferroptosis susceptibility.
MTCH1	HGNC:17586	ENSG00000137409	_NA_
PVT1	HGNC:9709	ENSG00000249859	PVT1 silencing or miR-214 overexpression significantly reduced infarct size and suppressed ferroptosis in vivo.
hsa_circ_0008367	_NA_	_NA_	These evidences suggested cIARS to be a positive regulator of ferroptosis in HCC cells.
MAP3K11	HGNC:6850	ENSG00000173327	Inhibition of MLK3 improves cardiac function and inhibits ferroptosis at week 8 of TAC.
BRD7	HGNC:14310	ENSG00000166164	Upregulated BRD7 expression contributes to HSC ferroptosis.
SLC25A28	HGNC:23472	ENSG00000155287	As expected, shRNA-mediated knockdown of SLC25A28 completely abolished the mitochondrial iron accumulation, and, in turn, impaired BRD7 knockin-enhanced ferroptotic cell death (Fig. 4G) and classical ferroptotic events.
MFN2	HGNC:16877	ENSG00000116688	Thus, Mfn2 appeared to act as a driving role in the evolution of ferroptosis and NASH induced by NaAsO2.
SLC11A2	HGNC:10908	ENSG00000110911	Overexpression of DMT1 promoted H/R-induced cell ferroptosis.
SLC11A2	HGNC:10908	ENSG00000110911	Conversely, DMT1 knockdown by siRNA evidently blocked temozolomide-induced ferroptosis in TG905 cells.
ZFAS1	HGNC:33101	ENSG00000177410	lncRNA ZFAS1 promotes lung fibroblast-to-myofibroblast transition and ferroptosis via functioning as a ceRNA through miR-150- 5p/SLC38A1 axis.
ZFAS1	HGNC:33101	ENSG00000177410	Inhibition of ZFAS1 repressed ferroptosis in mice with DbCM鈥?and HG鈥恡reated cardiomyocytes.
TSC1	HGNC:12362	ENSG00000165699	Haploinsufficiency of Tsc1 in tubular cells prevents cisplatin-induced tubular cell death and AKI.
SNCA	HGNC:11138	ENSG00000145335	Alpha synuclein aggregation drives ferroptosis: an interplay of iron, calcium and lipid peroxidation.
STING1	HGNC:27962	ENSG00000184584	The CGAS-STING1 pathway promotes zalcitabine-induced ferroptosis.
STING1	HGNC:27962	ENSG00000184584	STING1 Promotes Ferroptosis Through MFN1/2-Dependent Mitochondrial Fusion.
HDDC3	HGNC:30522	ENSG00000184508	Ferroptosis-inducing erastin or cystine deprivation elevates MESH1, whose overexpression depletes NADPH and sensitizes cells to ferroptosis, whereas MESH1 depletion promotes ferroptosis survival by sustaining the levels of NADPH and GSH and by reducing lipid peroxidation.
MIR761	HGNC:37305	ENSG00000283899	Additionally, circ-TTBK2 knockdown or miR-761 increase could retard cell prolifera_x0002_tion, invasion, and promote ferroptosis in glioma cells.
MDM2	HGNC:6973	ENSG00000135679	MDM2 and MDMX promote ferroptosis by PPAR伪-mediated lipid remodeling.
MDM4	HGNC:6974	ENSG00000198625	MDM2 and MDMX promote ferroptosis by PPAR伪-mediated lipid remodeling.
MIR214	HGNC:31591	ENSG00000283844	MicroRNA-214-3p enhances erastin-induced ferroptosis by targeting ATF4 in hepatoma cells.
DLD	HGNC:2898	ENSG00000091140	DLD links to ferroptosis induced by cystine deprivation or import inhibition. DLD gene silencing caused a significant reduction in cellular and lipid ROS levels induced by cystine deprivation but did not change intracellular GSH contents.
WWTR1	HGNC:24042	ENSG00000018408	TAZ removal confers ferroptosis resistance, while TAZS89A overexpression sensitizes cells to ferroptosis.
LGMN	HGNC:9472	ENSG00000100600	Legumain promotes tubular ferroptosis by facilitating chaperone-mediated autophagy of GPX4 in AKI.
SMPD1	HGNC:11120	ENSG00000166311	Importantly, genetic activation of ASM increases ferroptosis in cancer cells induced by various FINs.
IFNA2	HGNC:5423	ENSG00000188379	Together, our results demonstrate that the autoantibodies and the increased IFN-伪 in SLE sera downregulate the expression of GPX4 and lead to neutrophil ferroptosis.
IFNA4	HGNC:5425	ENSG00000236637	Together, our results demonstrate that the autoantibodies and the increased IFN-伪 in SLE sera downregulate the expression of GPX4 and lead to neutrophil ferroptosis.
IFNA5	HGNC:5426	ENSG00000147873	Together, our results demonstrate that the autoantibodies and the increased IFN-伪 in SLE sera downregulate the expression of GPX4 and lead to neutrophil ferroptosis.
IFNA6	HGNC:5427	ENSG00000120235	Together, our results demonstrate that the autoantibodies and the increased IFN-伪 in SLE sera downregulate the expression of GPX4 and lead to neutrophil ferroptosis.
IFNA8	HGNC:5429	ENSG00000120242	Together, our results demonstrate that the autoantibodies and the increased IFN-伪 in SLE sera downregulate the expression of GPX4 and lead to neutrophil ferroptosis.
IFNA10	HGNC:5418	ENSG00000186803	Together, our results demonstrate that the autoantibodies and the increased IFN-伪 in SLE sera downregulate the expression of GPX4 and lead to neutrophil ferroptosis.
IFNA13	HGNC:5419	ENSG00000233816	Together, our results demonstrate that the autoantibodies and the increased IFN-伪 in SLE sera downregulate the expression of GPX4 and lead to neutrophil ferroptosis.
IFNA14	HGNC:5420	ENSG00000228083	Together, our results demonstrate that the autoantibodies and the increased IFN-伪 in SLE sera downregulate the expression of GPX4 and lead to neutrophil ferroptosis.
IFNA17	HGNC:5422	ENSG00000234829	Together, our results demonstrate that the autoantibodies and the increased IFN-伪 in SLE sera downregulate the expression of GPX4 and lead to neutrophil ferroptosis.
PPARG	HGNC:9236	ENSG00000132170	PPARG drives ferroptosis in DCs.
MIR335	HGNC:31773	ENSG00000199043	miR-335 promotes ferroptosis by targeting ferritin heavy chain 1 in in vivo and in vitro models of Parkinson's disease.
SNX5	HGNC:14969	ENSG00000089006	Super-enhancer-driven Sorting Nexin 5 expression promotes dopaminergic neuronal ferroptosis in Parkinson's disease models.
PAQR3	HGNC:30130	ENSG00000163291	PAQR3 aggravated ferroptosis in ALL.
TOR2A	HGNC:11996	ENSG00000160404	The data clearly demonstrated that salusin-尾 might be responsible for HG-induced ferroptosis via inhibiting the Nrf-2 signaling pathway.
MIR375	HGNC:31868	ENSG00000198973	MiR-375 reduces the stemness of gastric cancer cells through triggering ferroptosis.
MAP3K14	HGNC:6853	ENSG00000006062	NIK Acts Cell Autonomously to Promote Hepatocyte Ferroptosis.
CircKDM4C	_NA_	_NA_	CircKDM4C upregulates P53 by sponging hsa-let-7b-5p to induce ferroptosis in acute myeloid leukemia.
MIR324	HGNC:31767	ENSG00000199053	miR-324-3p reverses cisplatin resistance by inducing GPX4-mediated ferroptosis in lung adenocarcinoma cell line A549.
QSOX1	HGNC:9756	ENSG00000116260	QSOX1 promotes sorafenib-induced ferroptosis by downregulating NRF2 in HCC cells.
MIB2	HGNC:30577	ENSG00000197530	Knockdown of MIB2 alleviated neuron death and ferroptosis induced by sevoflurane exposure.
KLF2	HGNC:6347	ENSG00000127528	Mechanistically, KLF2 deficiency is sufficient to inhibit ferroptosis on account of the impairment of transcriptional repression of GPX4 and thus promotes the migration and invasion of RCC cells.
MIR5096	HGNC:41611	_NA_	Ectopically expressed miR-5096 causes ferroptotic cell death by elevating iron accumulation and oxidation of GSH but decreases MMP.
HOTAIR	HGNC:33510	ENSG00000228630	Overexpression of HOTAIR reversed the ferroptosis inhibition effects of PAN in hemin-treated neurons.
H19	HGNC:4713	ENSG00000130600	Over-expression of H19 suppressed cell viability and promoted ferroptosis of BMVECs.
FOXO4	HGNC:7139	ENSG00000184481	In addition, the inhibitory effects of ENPP2 on DOX-induced ferroptosis were significantly reduced by FoxO4 overexpression, as demonstrated by increased Fe2+ and lipid ROS activity levels, decreased SLC7A11, GPX4 and FPN1 expression, and increased NOX4 expression, which were observed following FoxO4 overexpression (Fig. 6A-C).
YTHDC2	HGNC:24721	ENSG00000047188	YTHDC2 is an endogenous ferroptosis inducer in LUAD cells.
TRIM46	HGNC:19019	ENSG00000163462	Taken together, these data demonstrate that TRIM46 directly facilitates HG-induced ferroptosis in HRCECs.
ACSL1	HGNC:3569	ENSG00000151726	These results demonstrate that ACSL1 promotes 伪ESA-triggered cell death.
KDM5A	HGNC:9886	ENSG00000073614	KDM5A inhibition decreases ferroptosis sensitivity in erPCC.
TRIM21	HGNC:11312	ENSG00000132109	Loss of TRIM21 alleviates cardiotoxicity by suppressing ferroptosis induced by the chemotherapeutic agent doxorubicin.
DPEP1	HGNC:3002	ENSG00000015413	Dpep1 knockdown ameliorates cisplatin-induced apoptosis and ferroptosis.
IDO1	HGNC:6059	ENSG00000131203	Inhibition of IDO prevents reoxygenation-induced ferroptosis.
GSTZ1	HGNC:4643	ENSG00000100577	GSTZ1 sensitizes hepatocellular carcinoma cells to sorafenib-induced ferroptosis via inhibition of NRF2/GPX4 axis.
GJA1	HGNC:4274	ENSG00000152661	Therefore, our results indicated that downregulation of Cx43 can inhibit ferroptosis by restoring the level of SLC7A11 in the system xc- transporter and alleviate cisplatin-induced AKI.
SLC7A11	HGNC:11059	ENSG00000151012	SLC7A11 Induces Ferroptosis in NSCLC Cells.
PGRMC1	HGNC:16090	ENSG00000101856	Our data suggest that PGRMC1 promotes ferroptosis by xCT inhibition in PCC.
CIRBP	HGNC:1982	ENSG00000099622	Suppression of CIRBP inhibits ferroptosis in HK2 cells.
circPSEN1	_NA_	_NA_	Knockdown of circ-PSEN1 suppresses ferroptosis of HG-treated ARPE19 cells.
USP11	HGNC:12609	ENSG00000102226	Increased expression of USP11 promotes ferroptosis.
YAP1	HGNC:16262	ENSG00000137693	Knockdown of YAP inhibits ferroptosis in HCC cells.
YAP1	HGNC:16262	ENSG00000137693	The Hippo Pathway Effector YAP Promotes Ferroptosis via the E3 Ligase SKP2.
MIR135B	HGNC:31760	ENSG00000199059	miR-135b-3p Promotes Cardiomyocyte Ferroptosis by Targeting GPX4 and Aggravates Myocardial Ischemia/Reperfusion Injury.
TRIM26	HGNC:12962	ENSG00000234127	TRIM26 Overexpression Promotes HSCs Ferroptosis.
MIR302A	HGNC:31623	ENSG00000207927	MicroRNA-302a-3p induces ferroptosis of non-small cell lung cancer cells via targeting ferroportin.
ASMTL-AS1	HGNC:25811	ENSG00000236017	In conclusion, we first demonstrated that ASMTL-AS1 positively regulated SAT1 to promote ferroptosis and could stabilize SAT1 mRNA via recruiting U2AF2, shedding a light on a novel molecular mechanism in LUAD progression.
PIEZO1	HGNC:28993	ENSG00000103335	Increased PIEZO1 expression or activation of PIEZO1 could activate Ca2+/calpain signaling, which promoted the cleavage VE-cadherin, thereby promoting ferroptosis.
LIFR	HGNC:6597	ENSG00000113594	LIFR and SHP1 positively regulate ferroptosis while LCN2 negatively regulates ferroptosis.
MIR15A	HGNC:31543	ENSG00000283785	Overexpression of miR-15a-5p aggravated ferroptosis in hypoxic cardiomyocytes.
MIR15A	HGNC:31543	ENSG00000283785	miR-15a-3p promotes ferroptosis through GPX4.
EGR1	HGNC:3238	ENSG00000120738	Knockdown of Egr-1 alleviated ferroptosis in HL-1 cells under anoxic condition.
ADAM23	HGNC:202	ENSG00000114948	Overexpression of ADAM23 suppressed tumorigenesis and promoted ferroptosis in esophageal carcinoma cells.
ARHGEF26-AS1	HGNC:41048	ENSG00000243069	LncRNA ARHGEF26-AS1 Facilitated Ferroptosis but Restrained Cell Growth and Positively Regulated ADAM23 by Sponging miR-372-3p in ECC.
CPEB1	HGNC:21744	ENSG00000214575	CPEB1 enhances erastin-induced ferroptosis in gastric cancer cells by suppressing twist1 expression.
COX4I2	HGNC:16232	ENSG00000131055	Our research illustrated that the knockdown of Cox4i2 suppresses HHV7-induced RSC96 cell ferroptosis as well as apoptosis via the ERK signalling pathway.
lncRNA AABR07017145.1	_NA_	_NA_	Importantly, we found that lncRNA AAB sponged and sequestered miR-30b-5p to induce the imbalance of MMP9/TIMP1, which enhanced the activation of transferrin receptor 1 (TFR-1) and then eventually led to the ferroptosis of CMECs.
TIMP1	HGNC:11820	ENSG00000102265	Silencing TIMP1 inhibits CMEC ferroptosis by downregulation of TFR-1.
METTL14	HGNC:29330	ENSG00000145388	METTL14 promotes doxorubicin-induced ferroptosis in cardiomyocytes.
MIB1	HGNC:21086	ENSG00000101752	The E3 Ligase MIB1 Promotes Proteasomal Degradation of NRF2 and Sensitizes Lung Cancer Cells to Ferroptosis.
MEG3	HGNC:14575	ENSG00000214548	Inhibition of Meg3 conferred protection to RBMVECs against OGD + HG-induced ferroptosis.
CCDC6	HGNC:18782	ENSG00000108091	The genetic depletion of CCDC6, by shCCDC6, made the NTERA-2 cells resistant to erastin-induced ferroptosis (Fig. 5 A).
MIR539	HGNC:32529	ENSG00000202560	miR-539 activates the SAPK/JNK signaling pathway to promote ferropotosis in colorectal cancer by directly targeting TIPE.
IFNA21	HGNC:5424	ENSG00000137080	Together, our results demonstrate that the autoantibodies and the increased IFN-伪 in SLE sera downregulate the expression of GPX4 and lead to neutrophil ferroptosis.
CHP1	HGNC:17433	ENSG00000187446	_NA_
SMAD7	HGNC:6773	ENSG00000101665	_NA_
SOCS1	HGNC:19383	ENSG00000185338	Expression of SOCS1 sensitized cells to ferroptosis inducer. This effect of SOCS1 was efficiently blocked by ferroptosis inhibitor. Expression of SOCS1 reduced the levels of GSH, explaining in part its ability to sensitize cells to ferroptosis.
TBK1	HGNC:11584	ENSG00000183735	hTBK1-c.978T>A mutation significantly inhibited the proliferation of NSC-34 cells via inducing cell ferroptosis, while the effect of TBK1 mutation was notably reversed by Ferrostatin-1 or p62 siRNA.
CGAS	HGNC:21367	ENSG00000164430	The CGAS-STING1 pathway promotes zalcitabine-induced ferroptosis.
NOX5	HGNC:14874	ENSG00000255346	Suppresses erastin-induced ferroptosis when inhibited by inhibitor.
ACO1	HGNC:117	ENSG00000122729	The gene targets of the enriched shRNAs are potential genes that positively regulate ferroptosis.
ACO1	HGNC:117	ENSG00000122729	Overexpression of IRP1 significantly promotes erastin- and RSL3-induced ferroptosis.
IFNA7	HGNC:5428	ENSG00000214042	Together, our results demonstrate that the autoantibodies and the increased IFN-伪 in SLE sera downregulate the expression of GPX4 and lead to neutrophil ferroptosis.
CLTRN	HGNC:29437	ENSG00000147003	CLTRN overexpression can increase ferroptosis in HCC, and CLTRN can enhance the radiosensitivity of HCC cells through the ferroptosis pathway.
NDRG1	HGNC:7679	ENSG00000104419	NDRG1 Activation Correlated with Ferroptosis Induction and EMT Inhibition.
MAPK3	HGNC:6877	ENSG00000102882	Inhibiting EGFR and MAPK signaling rescued cell viability following cystine withdrawal.
MAPK3	HGNC:6877	ENSG00000102882	ERK1/2 inhibitors inhibited t-BHP-induced ferroptosis. t-BHP treatment significantly increased the protein expression of p-ERK.
ATG13	HGNC:29091	ENSG00000175224	Knockout of ATG13 greatly reduced the sensitivity of MEFs to ferropotosis, and reconstituting ATG13 back to these cells restored the ferroptosis sensitivity.
TP53	HGNC:11998	ENSG00000141510	Inhibits cystine uptake and sensitizes cells to ferroptosis. Erastin induced high levels of cell death in p53+/+ MEFs.
TP53	HGNC:11998	ENSG00000141510	Wild type p53 can induce ferroptosis upon reactive oxygen species (ROS)-induced stress.
TP53	HGNC:11998	ENSG00000141510	p53^3KR/3KR Xrcc4^-/- MEF cells are very sensitive to ferroptosis. Stabilized in the spleens of p53^3KR/3KR Xrcc4^-/- mice which enables to prevent the development of pro-B-cell lymphomas.
TP53	HGNC:11998	ENSG00000141510	Incubation with erastin led to profound cell death in wild-type MEFs.
TP53	HGNC:11998	ENSG00000141510	p53 acetylation has a critical role in ferroptotic responses. Simultaneous loss of K98/117/161/162 acetylations is unable to induce ferroptosis, and its ability to thwart cancer growth is also abrogated.
TP53	HGNC:11998	ENSG00000141510	Facilitates ART-induced ferroptosis. Conversely, knockdown of P53 blocked ART-induced ferroptosis.
TP53	HGNC:11998	ENSG00000141510	Additionally, p53 knockdown and S392A mutant both can reduced the classical ferroptotic events by BRD7 knockin, including redox-active iron overload, lipid ROS accumulation, GSH depletion, and lipid peroxidation.
TP53	HGNC:11998	ENSG00000141510	p53 promotes RT-induced ferroptosis partly through antagonizing SLC7A11 induction.
TP53	HGNC:11998	ENSG00000141510	p53 promoted SPIO-Serum-induced ferroptosis.
DDR2	HGNC:2731	ENSG00000162733	DDR2 elevation in recurrent tumor cells contributes to its ferroptosis sensitivity.
AMN	HGNC:14604	ENSG00000166126	_NA_
TGFB1	HGNC:11766	ENSG00000105329	Therefore, PLC/PRF/5 cells and Huh7 cells were vulnerable to RSL3 in the presence of TGF-尾1.
MAPK14	HGNC:6876	ENSG00000112062	Ferroptosis was blocked by inhibiting p38 MAPK activation.
MICU1	HGNC:1530	ENSG00000107745	MICU1 deficiency suppresses cold stress-induced ferroptosis.
SIRT3	HGNC:14931	ENSG00000142082	SIRT3 deficiency is resistant to autophagy鈥恉ependent ferroptosis by inhibiting the AMPK/mTOR pathway and promoting GPX4 levels.
SIRT3	HGNC:14931	ENSG00000142082	Collectively, our studies indicate that SIRT3 functions to inhibit AKT-dependent mitochondrial metabolism and EMT, leading to ferroptosis and tumor suppression.
G6PD	HGNC:4057	ENSG00000160211	Required in erastin-induced ferroptosis.
EGFR	HGNC:3236	ENSG00000146648	Cell death in activated EGFR mutant cells occurs by ferroptosis. Inhibiting EGFR and MAPK signaling rescued cell viability following cystine withdrawal.
MAPK1	HGNC:6871	ENSG00000100030	Inhibiting EGFR and MAPK signaling rescued cell viability following cystine withdrawal.
MAPK1	HGNC:6871	ENSG00000100030	ERK1/2 inhibitors inhibited t-BHP-induced ferroptosis. t-BHP treatment significantly increased the protein expression of p-ERK.
PANX1	HGNC:8599	ENSG00000110218	Deletion protects against ferroptotic cell death. Silenced Panx1 expression significantly attenuated ferroptotic lipid peroxidation and iron accumulation induced by the ferroptosis inducer erastin.
ACSF2	HGNC:26101	ENSG00000167107	Required in erastin-induced ferroptosis. Silencing of it conferred against erastin-induced ferroptosis.
ULK1	HGNC:12558	ENSG00000177169	Potential positive regulators of ferroptosis. Knockout of ULK1 led to significantly lower levels of erastin-induced ferroptosis in a dose- and time-dependent manner.
SLC39A14	HGNC:20858	ENSG00000104635	Loss of hepatic Slc39a14 protects against ferroptosis-induced liver fibrosis in Trf-LKO mice
ABCC1	HGNC:51	ENSG00000103222	Accelerates ferroptosis. Disruption of MRP1 inhibited ferroptosis potently.
GSK3B	HGNC:4617	ENSG00000082701	Silence of GSK-3尾 blocked erastin-induced ferroptosis with less production of ROS and malondialdehyde (MDA) via upregulation of GPX4 and downregulation of arachidonate 15-lipoxygenase (Alox15), overexpression of GSK-3尾 enhanced erastin-triggered ferroptosis with elevated ROS and MDA
GSK3B	HGNC:4617	ENSG00000082701	GSK-3尾 knockdown suppresses erastin-induced ferroptosis.
CYBB	HGNC:2578	ENSG00000165168	Suppresses erastin-induced ferroptosis when inhibited by inhibitor.
PTPN6	HGNC:9658	ENSG00000111679	LIFR and SHP1 positively regulate ferroptosis while LCN2 negatively regulates ferroptosis.
AQP5	HGNC:638	ENSG00000161798	Further, we observed that aquaporin (AQP) 3, 5, and 8 bind nicotinamide-adenine dinucleotide phosphate oxidase 2 and regulate the permeability of extracellular H2O2, thereby contributing to ferroptosis.
PGD	HGNC:8891	ENSG00000142657	Required in erastin-induced ferroptosis.
FADS2	HGNC:3575	ENSG00000134824	We unexpectedly found that siRNA depletion of FADS2, like treatment with DFO or the ferroptosis inhibitor ferrostatin-1 (Fer1) (Dixon et al., 2012), protected cells from ferroptosis induced by the cystine/glutamate transporter (xCT) inhibitor erastin and the GPX4 inhibitor RSL3 in Huh-7.5 cells (Figures 5A, 5B, and S5A).
LONP1	HGNC:9479	ENSG00000196365	Inhibition of LONP1 negatively regulates erastin-induced cell death.
LONP1	HGNC:9479	ENSG00000196365	Inhibition of LONP1 protects against erastin-induced ferroptosis in Pancreatic ductal adenocarcinoma PANC1 cells.
CDKN2A	HGNC:1787	ENSG00000147889	Combination of ARF induction and ROS treatment induced ferroptotic cell death. Knockdown of endogenous ARF protected cells from ROS-induced cell death.
CFL1	HGNC:1874	ENSG00000172757	Cofilin1 downregulation attenuates glutamate- and erastin-induced cell death.
TNFAIP3	HGNC:11896	ENSG00000118503	Overexpression increased ROS generation and enhanced erastin-induced ferroptosis, whereas knockdown inhibited erastin-induced ferroptosis.
PEX6	HGNC:8859	ENSG00000124587	_NA_
PRKCA	HGNC:9393	ENSG00000154229	Similarly, genetic knockdown of PKC伪 significantly protected RMS cells from Erastin-induced cell death.
LPCAT3	HGNC:30244	ENSG00000111684	Deletion of this gene likely suppress ferroptosis by limiting the membrane-resident pool of oxidation-sensitive fatty acids.
LPCAT3	HGNC:30244	ENSG00000111684	Knockdown of Lpcat3 increased resistance to ferroptosis triggered by RSL3.
LPCAT3	HGNC:30244	ENSG00000111684	_NA_
VDAC2	HGNC:12672	ENSG00000165637	Overexpression could partially protect cells from ferroptosis.
PIK3CA	HGNC:8975	ENSG00000121879	Notably, we found that cancer cells carrying PIK3CA activating mutation or PTEN deletion appeared to be more resistant to RSL3. These mutations lead to the activation of the oncogenic PI3K-AKT signaling pathway. Therefore, sustained activation of the PI3K-AKT-mTOR pathway protects cancer cells from ferroptotic cell death.
TFRC	HGNC:11763	ENSG00000072274	Tfr1 deletion activates ferroptosis in skeletal muscle upon muscular regeneration.
GOT1	HGNC:4432	ENSG00000120053	GOT1 suppression potentiates ferroptosis sensitivity.
HMOX1	HGNC:5013	ENSG00000100292	Knockdown of p62, quinone oxidoreductase鈥?, heme oxygenase鈥?, and ferritin heavy chain鈥? by RNA interference in HCC cells promoted ferroptosis in response to erastin and sorafenib.
HMOX1	HGNC:5013	ENSG00000100292	Demonsrates antiferroptotic role. HO-1 deficiency promotes erastin-induced ferroptosis.
HMOX1	HGNC:5013	ENSG00000100292	WT MEFs became more sensitive to ferroptosis by knockdown of Hmox1 than cells with control knockdown (Figs. S5D, S6D, and S7D).
PRKAA2	HGNC:9377	ENSG00000162409	AMPK inactivation sensitizes cancer cells to ferroptotic cell death.
HIF1A	HGNC:4910	ENSG00000100644	Destabilizing HIF1A facilitated ferroptotic tumor cell death.
HIF1A	HGNC:4910	ENSG00000100644	Knock-down of HIF-1伪 increases free iron level, promotes mitochondrial iron accumulation and induces ferroptosis under hypoxia.
SIRT1	HGNC:14929	ENSG00000096717	SIRT1 inhibits FCs ferroptosis in excess iron.
IL6	HGNC:6018	ENSG00000136244	IL-6 reverses ferroptosis in vivo and in vitro by upregulating xCT.
ATF4	HGNC:786	ENSG00000128272	Inhibition of ATF4 expression increased erastin-induced cell death. ATF4 results in the induction of HSPA5, which in turn protects against GPX4 protein degradation and subsequent ferroptosis.
ATF4	HGNC:786	ENSG00000128272	ATF4 expression induces acquired cell death resistance. ATF4 knockdown renders cells susceptible for ferroptosis.
MIR214	HGNC:31591	ENSG00000283844	PVT1 silencing or miR-214 overexpression significantly reduced infarct size and suppressed ferroptosis in vivo.
SMPD1	HGNC:11120	ENSG00000166311	Together, knockdown of Smpd1 and Taz expression responsible for CER and CL synthesis, respectively, aggravated APAP-induced mitochondrial dysfunction and ferroptosis in hepatocytes.
SLC7A11	HGNC:11059	ENSG00000151012	Silencing of SLC7A11 sensitized HT-1080 cells to erastin-induced death, whereas transfection of HT-1080 cells with a plasmid encoding SLC7A11 conferred protection from erastin- and sulfasalazine-induced death.
SLC7A11	HGNC:11059	ENSG00000151012	Overexpressed in human cancer specimens. Overexpression inhibits ROS-induced ferroptosis.
SLC7A11	HGNC:11059	ENSG00000151012	Overexpression of SLC7A11 considerably abrogated ferroptosis.
SLC7A11	HGNC:11059	ENSG00000151012	Knockdown increased cell death.
SLC7A11	HGNC:11059	ENSG00000151012	Inhibition induces ferroptosis. Silencing of the SLC7A11 gene increases the cisplatin sensitivity of resistant HNC cells.
SLC7A11	HGNC:11059	ENSG00000151012	Elevated levels of expression are resistant to erastin-induced ferroptosis. Repression of SLC7A11 expression by p53 sensitized cells to undergo erastin-induced ferroptosis.
SLC7A11	HGNC:11059	ENSG00000151012	Slc7a11 deletion increases susceptibility to iron overload-induced ferroptosis.
SLC7A11	HGNC:11059	ENSG00000151012	Knockdown sensitized cells to erastin.
SLC7A11	HGNC:11059	ENSG00000151012	Overexperession of SLC7A11 attenuated BAY-inhibited cell viability by ferroptosis.
SLC7A11	HGNC:11059	ENSG00000151012	Furthermore, we found that SLC7A11 knockdown increased vulnerability of mature MO3.13 cells to ferroptosis.
SLC7A11	HGNC:11059	ENSG00000151012	Knockout of SLC7A11 facilitates the process of ferroptosis in colorectal CSCs.
SLC7A11	HGNC:11059	ENSG00000151012	Collectively, these data suggest that SLC7A11 inhibits the ferroptosis induced by IMCA.
SLC7A11	HGNC:11059	ENSG00000151012	xCT inhibition induces MF-HSC ferroptosis.
SLC7A11	HGNC:11059	ENSG00000151012	SLC7A11 Overexpression Induces Ferroptosis Resistance.
USP11	HGNC:12609	ENSG00000102226	USP11 ablation inhibits cell proliferation and sensitizes H1299 cells to ferroptosis during ROS-mediated stress.
GPX4	HGNC:4556	ENSG00000167468	RNAi-mediated GPX4 knockdown induces ferroptosis.
GPX4	HGNC:4556	ENSG00000167468	Knockout of glutathione peroxidase 4 (Gpx4) causes cell death in a pathologically relevant form of ferroptosis. Knockdown renders cells more sensitive to ferroptosis-inducing agents.
GPX4	HGNC:4556	ENSG00000167468	Ex vivo, Gpx4-deficient T cells rapidly accumulated membrane lipid peroxides and concomitantly underwent cell death driven by ferroptosis.
GPX4	HGNC:4556	ENSG00000167468	Knockdown increased cell death.
GPX4	HGNC:4556	ENSG00000167468	Protects lipid peroxidation. Cell damage induced by GPx4 ablation is involved in ferroptosis.
GPX4	HGNC:4556	ENSG00000167468	Ferroptosis drives neurodegeneration in Gpx4BIKO mice.
GPX4	HGNC:4556	ENSG00000167468	Downregulation conferred increased sensitivity to ferroptosis following cystine deprivation.
GPX4	HGNC:4556	ENSG00000167468	Activation blocked ferroptosis.
GPX4	HGNC:4556	ENSG00000167468	GPX4-overexpressing cells were resistant to reactive oxygen species-induced cell death. Conversely, GPX4-knockdown cells were sensitive to reactive oxygen species-induced cell death.
GPX4	HGNC:4556	ENSG00000167468	Overexpression GPX4 resulted in decreased cell death after RSL3 treatment. Moreover, this effect was able to be reversed by overexpression of GPX4.
GPX4	HGNC:4556	ENSG00000167468	Depletion or inhibition resulted in cell death by ferroptosis.
GPX4	HGNC:4556	ENSG00000167468	Overexpression of GPX4 significantly reduced lipid peroxidation and cell death in the experimental SAH models both in vivo and in vitro.
GPX4	HGNC:4556	ENSG00000167468	Glutathione peroxidase (GPX4) is critical for the reduction of toxic lipid hydroperoxides to their corresponding non-deleterious alcohols at the expense of reduced glutathione and thereby prevents cellular damage and induction of ferroptosis.
GPX4	HGNC:4556	ENSG00000167468	GPX4 depletion induces autophagy-dependent ferroptosis.
GPX4	HGNC:4556	ENSG00000167468	GPX4 deficiency induces HSPC ferroptosis in vitro.
GPX4	HGNC:4556	ENSG00000167468	The glutathione peroxidase Gpx4 prevents lipid peroxidation and ferroptosis to sustain Treg cell activation and suppression of antitumor immunity.
AKR1C2	HGNC:385	ENSG00000151632	Up-regulated in DU-145 erastin-resistant clones. Participate in the detoxification of toxic lipid metabolites. May confer partial resistance to erastin by enhancing the detoxification of reactive aldehydes generated downstream of the oxidative destruction of the plasma membrane during ferroptosis.
AKR1C2	HGNC:385	ENSG00000151632	Inhibition completely resensitizes resistant melanoma cells to ferroptosis execution.
AKR1C3	HGNC:386	ENSG00000196139	Up-regulated in DU-145 erastin-resistant clones. Participate in the detoxification of toxic lipid metabolites. May confer partial resistance to erastin by enhancing the detoxification of reactive aldehydes generated downstream of the oxidative destruction of the plasma membrane during ferroptosis.
AKR1C3	HGNC:386	ENSG00000196139	Inhibition completely resensitizes resistant melanoma cells to ferroptosis execution.
RB1	HGNC:9884	ENSG00000139687	Rb knock-down cells exposed to sorafenib encounter ferroptosis. Lack of Rb sensitized HCC cells to the induction of ferroptosis.
GCLC	HGNC:4311	ENSG00000001084	RNAi knockdown sensitized cell death induced by cystine starvation.
GCLC	HGNC:4311	ENSG00000001084	Non-canonical Glutamate-Cysteine Ligase Activity Protects against Ferroptosis
NFE2L2	HGNC:7782	ENSG00000116044	NRF2 plays a central role in protecting hepatocellular carcinoma (HCC) cells against ferroptosis
NFE2L2	HGNC:7782	ENSG00000116044	Required for sorafenib鈥恑nduced expression of MT鈥?G which is a ferroptosis suppressor.
NFE2L2	HGNC:7782	ENSG00000116044	Nrf2 activation contributes to the resistance of HNCs to artesunate-induced ferroptosis. Nrf2 inhibition sensitizes head and neck cancer cells to artesunate-induced ferroptosis.
NFE2L2	HGNC:7782	ENSG00000116044	Nrf2 over expression promotes resistance to ferroptosis.
NFE2L2	HGNC:7782	ENSG00000116044	ARF-mediated ferroptosis was largely abrogated by co-expression of NRF2.
NFE2L2	HGNC:7782	ENSG00000116044	Associated with resistance to ferroptosis. Inhibition of Nrf2 sensitized cells to ferroptosis.
NFE2L2	HGNC:7782	ENSG00000116044	Genetically repression of NRF2 enhanced ferroptosis susceptibility.
NFE2L2	HGNC:7782	ENSG00000116044	In FRDA fibroblasts, both treatments promoted the nuclear translocation of Nrf2 (Fig. 5A) and the inhibition of redox imbalance and ferroptosis.
NFE2L2	HGNC:7782	ENSG00000116044	Up-regulating Nrf2 alleviated the diabetes related ferroptosis in kidneys.
NFE2L2	HGNC:7782	ENSG00000116044	Nrf2 Upregulation Inhibits Ferroptosis and Plays a Protective Role in IIR-ALI.
NFE2L2	HGNC:7782	ENSG00000116044	Furthermore, Nfe2l2 (Nrf2) knockdown sensitized cells to ferroptotic cell death.
NFE2L2	HGNC:7782	ENSG00000116044	Nrf2 acivation inhibited seawater-induced ferroptosis in MLE-12 cells. Nrf2 deficiency aggravated lung injury and ferroptosis in mice induced by seawater drowning.
NFE2L2	HGNC:7782	ENSG00000116044	NRF2 negatively regulates FOCAD expression. FOCAD enhances the sensitivity of NSCLC cells to the ferroptosis induced by cysteine deprivation, but not GPX4 inhibition.
NFE2L2	HGNC:7782	ENSG00000116044	Nrf2 inhibition promotes erastin鈥慽nduced ferroptosis.
NFE2L2	HGNC:7782	ENSG00000116044	Nrf2 inhibits ferroptosis and protects against acute lung injury due to intestinal ischemia reperfusion via regulating SLC7A11 and HO-1.
NFE2L2	HGNC:7782	ENSG00000116044	Genetically repression of NRF2 enhanced ferroptosis susceptibility.
NQO1	HGNC:2874	ENSG00000181019	Knockdown of p62, quinone oxidoreductase鈥?, heme oxygenase鈥?, and ferritin heavy chain鈥? by RNA interference in HCC cells promoted ferroptosis in response to erastin and sorafenib.
MUC1	HGNC:7508	ENSG00000185499	MUC1-C (C-terminal subunit) blocks erastin-induced ferroptosis and induces increases in GSH.
SLC3A2	HGNC:11026	ENSG00000168003	Required for in vitro cell survival because of its role in protecting cells from ferroptosis.
SLC40A1	HGNC:10909	ENSG00000138449	Involved in siramesine and lapatinib-induced ferroptotic cell death. Its expression is decreased after treatment with siramesine alone or in combination with lapatinib. Overexpression FPN resulted in decreased ROS and cell death whereas knockdown of FPN increased cell death after siramesine and lapatinib treatment.
SLC40A1	HGNC:10909	ENSG00000138449	Overexpression of Fpn inhibited ferroptosis.
SLC40A1	HGNC:10909	ENSG00000138449	A negative regulator of ferroptosis by reducing intracellular iron concentration. Knockdown accelerates erastin-induced ferroptosis.
CISD1	HGNC:30880	ENSG00000122873	Genetic inhibition of CISD1 contributes to erastin-induced ferroptosis. Stabilization of the iron sulfur cluster of CISD1 inhibits ferroptosis.
FTMT	HGNC:17345	ENSG00000181867	Overexpression significantly inhibited erastin-induced ferroptosis.
FTMT	HGNC:17345	ENSG00000181867	FTMT and ferritin heavy chain (FTH) cooperated to protect macrophages from RSL-3-induced ferroptosis under hypoxia as this form of cell death is linked to iron metabolism. In hypoxic macrophages either FTMT or FTH was sufficient to pro_x0002_tect from ferroptosis
FTMT	HGNC:17345	ENSG00000181867	Overexpression of FtMt reduced osteoblastic ferroptosis under high glucose condition while silent FtMt induced mitophagy through ROS / PINK1/Parkin pathway.
FTMT	HGNC:17345	ENSG00000181867	FtMt deletion aggravates cerebral I/R-induced ferroptosis.
HSPA5	HGNC:5238	ENSG00000044574	Negatively regulates ferroptosis. Suppression of HSPA5 expression increased erastin-induced death. Overexpressed HSPA5 inhibited erastin-induced ferroptotic cell death.
HSPA5	HGNC:5238	ENSG00000044574	Knockdown of GRP78 enhanced artesunate-induced ferroptosis of pancreatic cancer cells.
HSPA5	HGNC:5238	ENSG00000044574	Serves as a negative regulator of DHA-induced ferroptosis.
HELLS	HGNC:4861	ENSG00000119969	LSH inhibits ferroptosis by decreasing the intracellular levels of iron and lipid ROS.
SCD	HGNC:10571	ENSG00000099194	Depletion of the SCD1 and FADS2 metabolic genes induces ferroptosis.
SCD	HGNC:10571	ENSG00000099194	Inhibition of SCD1 induces ferroptotic cell death. Expression of SCD1 protects cells from ferroptosis.
SCD	HGNC:10571	ENSG00000099194	Genetic and Pharmacological Inhibition of SCD1 Prevents the Growth of STK11/KEAP1 Co-mutant Cells and Sensitizes Those Cells to Ferroptosis Induction.
SCD	HGNC:10571	ENSG00000099194	Collectively, this study demonstrated that SCD1 could promote tumor growth of gastric cancer cells and protect them from ferroptotic cell death.
SCD	HGNC:10571	ENSG00000099194	Mechanistically, SCD1 leads to fatty acid (FA) desaturation and FABP4 derived from TEM enhances lipid droplet (LD) in cancer cells, which cooperatively protect from oxidative stress-induced ferroptosis.
SRC	HGNC:11283	ENSG00000197122	Src-STAT3 activation renders the cell unable to undergo to ferroptosis. Src inhibition decreased cell viability significantly, and that loss of viability was rescued by ferroptosis inhibitors.
STAT3	HGNC:11364	ENSG00000168610	Src-STAT3 activation renders the cell unable to undergo to ferroptosis.
STAT3	HGNC:11364	ENSG00000168610	Upregulated in ferroptosis resistant cells. Inhibition increases ferroptosis.
STAT3	HGNC:11364	ENSG00000168610	STAT3 Overexpression Upregulates SLC7A11 and Ameliorates OGD/R-Induced MLE12 Ferroptosis.
MIR137	HGNC:31523	ENSG00000284202	Suppresses ferroptosis both in vitro and in vivo.
FH	HGNC:3700	ENSG00000091483	FH inactivation (FH-/- ) proves synthetic lethal with inducers of ferroptosis. FH-/- sensitizes cells to multiple ferroptosis inducers.
CISD2	HGNC:24212	ENSG00000145354	Overexpression conferred resistance to ferroptosis. Inhibition blocked resistance to ferroptotic cell death.
CISD2	HGNC:24212	ENSG00000145354	Knockdown of CISD2 Promotes Ferroptosis in Sorafenib-Resistant Cells.
MIR9-1	HGNC:31641	ENSG00000207933	Overexpression of miR鈥? suppressed GOT1, which subsequently reduced ferroptosis. Suppression of miR鈥? increased the sensitivity of melanoma cells to ferroptosis inducers.
MIR9-2	HGNC:31642	ENSG00000284447	Overexpression of miR鈥? suppressed GOT1, which subsequently reduced ferroptosis. Suppression of miR鈥? increased the sensitivity of melanoma cells to ferroptosis inducers.
MIR9-3	HGNC:31646	ENSG00000284329	Overexpression of miR鈥? suppressed GOT1, which subsequently reduced ferroptosis. Suppression of miR鈥? increased the sensitivity of melanoma cells to ferroptosis inducers.
CBS	HGNC:1550	ENSG00000160200	Inhibition triggers ferroptosis in hepatocellular carcinoma.
CBS	HGNC:1550	ENSG00000160200	Knockdown in erastin-resistant cells caused ferroptotic cell death, while overexpression conferred ferroptosis resistance.
CBS	HGNC:1550	ENSG00000160200	CBS RNAi-induced cell death was also blocked by Fer-1 and Lip-1, indicating that inhibition of CBS in the context of system Xc- blockage caused ferroptosis.
CBS	HGNC:1550	ENSG00000160200	CBS Protects BLBC Tumors from Oxidative Stress and Ferroptotic Cell Death.
ISCU	HGNC:29882	ENSG00000136003	Over expression significantly attenuated DHA induced ferroptosis.
ACSL3	HGNC:3570	ENSG00000123983	Required for exogenous monounsaturated fatty acids to protect cells against ferroptosis. Negatively correlates with ferroptosis sensitivity.
CD44	HGNC:1681	ENSG00000026508	Knockdown sensitizes cells to ferroptosis.
LINC00336	HGNC:33813	ENSG00000197251	Overexpression inhibits ferroptosis. Knockdown promotes ferroptosis.
BRD4	HGNC:13575	ENSG00000141867	Inhibition induces ferroptosis.
BRD4	HGNC:13575	ENSG00000141867	Inhibition of BET and the proteasome triggers ferroptosis cell death.
PRDX6	HGNC:16753	ENSG00000117592	A negative regulator of ferroptotic cell death.
PRDX6	HGNC:16753	ENSG00000117592	Prdx6 overexpression also eliminated ferroptosis caused by HG, which was reflected in the suppression of iron accumulation and the increase in SLC7A11 and GPX4 expression.
MIR17	HGNC:31547	ENSG00000284536	Protects endothelial HUVEC cells from erastin-induced ferroptosis. Overexpression significantly reduced erastin-induced growth inhibition and ROS generation of HUVEC cells.
ARNTL	HGNC:701	ENSG00000133794	Degration of the protein is critical for ferroptosis. Blocking ARNTL degradation diminished ferroptotic tumor cell death.
JUN	HGNC:6204	ENSG00000177606	O-GlcNAcylated c-Jun represents an obstructive factor to ferroptosis.
TMBIM4	HGNC:24257	ENSG00000155957	Protects against ferroptosis in HCC cells. Inhibition increased ferroptotic cel death.
MIR212	HGNC:31589	ENSG00000267195	Overexpression of miR-212-5p attenuated ferroptosis while downregulation of miR-212-5p promoted ferroptotic cell death.
Fer1HCH	_NA_	_NA_	Reduced heavy chain levels caused severe mitochondrial defects and ferroptosis.
AIFM2	HGNC:21411	ENSG00000042286	A glutathione-independent ferroptosis suppressor. Pharmacological targeting of FSP1 strongly synergizes with GPX4 inhibitors to trigger ferroptosis.
AIFM2	HGNC:21411	ENSG00000042286	A potent ferroptosis-resistance factor. Positively correlates with ferroptosis resistance.
AIFM2	HGNC:21411	ENSG00000042286	AIFM2 blocks ferroptosis independent of ubiquinol metabolism.
LAMP2	HGNC:6501	ENSG00000005893	Knockdown promoted ferroptosis.
LAMP2	HGNC:6501	ENSG00000005893	Lysosome-associated membrane protein-2 deficiency increases the risk of reactive oxygen species-induced ferroptosis in retinal pigment epithelial cells.
ZFP36	HGNC:12862	ENSG00000128016	ZFP36 plasmid impaired FBXW7 plasmid-induced HSC ferroptosis. Overexpression of Zfp36 impaired erastin- or sorafenib-induced ferroptosis.
ZFP36	HGNC:12862	ENSG00000128016	RNA-binding protein ZFP36/TTP protects against ferroptosis by regulating autophagy signaling pathway in hepatic stellate cells.
CHMP5	HGNC:26942	ENSG00000086065	Ferroptosis activators increase ESCRT-III subunits (e.g., CHMP5 and CHMP6). Knockdown of CHMP5 or CHMP6 sensitizes human cancer cells to ferroptosis.
CHMP5	HGNC:26942	ENSG00000086065	Compared to the control shRNA group, suppressing CHMP5 or CHMP6 expression by shRNA increased erastin- or RSL3-induced cell death (Fig. 3B), indicating that ESCRT-III plays a pro-survival role in ferroptosis.
CHMP6	HGNC:25675	ENSG00000176108	Ferroptosis activators increase ESCRT-III subunits (e.g., CHMP5 and CHMP6). Knockdown of CHMP5 or CHMP6 sensitizes human cancer cells to ferroptosis.
CHMP6	HGNC:25675	ENSG00000176108	Compared to the control shRNA group, suppressing CHMP5 or CHMP6 expression by shRNA increased erastin- or RSL3-induced cell death (Fig. 3B), indicating that ESCRT-III plays a pro-survival role in ferroptosis.
CAV1	HGNC:1527	ENSG00000105974	Cav-1 deficiency aggravated ferroptosis. Short hairpin RNA of Cav-1 promoted ferroptosis, which was ameliorated by Cav-1 overexpression.
CAV1	HGNC:1527	ENSG00000105974	Higher expression of CAV1 inhibits ferroptosis of cancer cells in HNSCC.
GCH1	HGNC:4193	ENSG00000131979	Gch1 overexpression and its downstream metabolites BH4/BH2 rescue from ferroptosis. Inhibition of GCH1 activity can sensitize resistant cancer cells to ferroptosis induction.
DAZAP1	HGNC:2683	ENSG00000071626	Furthermore, DAZAP1 significantly reduced cellular sensitivity to sorafenib (SF), which had been proven to be an inducer of ferroptosis by targeting the system Xc鈭?
FTL	HGNC:3999	ENSG00000087086	Ferritin upregulation prevents ferroptosis by mediating P53 and SLC7A11 expression.
FTL	HGNC:3999	ENSG00000087086	Meanwhile, we also showed that apoferritin prevented MPTP-induced ferroptosis effectively by inhibiting the up-regulation of long-chain acyl-CoA synthetase 4 (ACSL4) and the down-regulation of ferroptosis suppressor protein 1 (FSP1).
HCAR1	HGNC:4532	ENSG00000196917	These observations support our hypothesis that HCAR1 and MCT1 are involved in the lactate-dependent ferroptosis resistance in tumor cells. Blocking the HCAR1/MCT1-Mediated Lactate Import Exacerbates Ferroptosis
SLC16A1	HGNC:10922	ENSG00000155380	These observations support our hypothesis that HCAR1 and MCT1 are involved in the lactate-dependent ferroptosis resistance in tumor cells. Blocking the HCAR1/MCT1-Mediated Lactate Import Exacerbates Ferroptosis
RRM2	HGNC:10452	ENSG00000171848	RRM2 exerts an anti-ferroptotic role in liver cancer cells by sustaining GSH synthesis.
RRM2	HGNC:10452	ENSG00000171848	Identification of critical ferroptosis regulators in lung adenocarcinoma that RRM2 facilitates tumor immune infiltration by inhibiting ferroptotic death.
NR4A1	HGNC:7980	ENSG00000123358	Pharmacological inhibition of NR4A1 promotes ferroptosis in pancreatic cancer cells
SREBF1	HGNC:11289	ENSG00000072310	SREBP1 Protects Cells from Ferroptosis through SCD1 Activity.
FZD7	HGNC:4045	ENSG00000155760	Conversely, FZD7 overexpression induced increased GPX4 mRNA and protein expression levels. FZD7 Marks a Cell Population Susceptible to GPX4 Inhibitors.
NT5DC2	HGNC:25717	ENSG00000168268	Knockdown of these target genes sensitized cells to known ferroptosis inducers, while PACMA31, a previously reported inhibitor of P4HB, directly induced ferroptosis and was highly synergistic with erastin.
MIR424	HGNC:31881	ENSG00000284231	In the present study, we show that miR-424-5p negatively regulates ferroptosis by directly targeting ACSL4 in ovarian cancer cells.
PARK7	HGNC:16369	ENSG00000116288	Therefore, our results further implied that the C terminus of DJ-1 mediates the suppression of ferroptosis, and when the C-terminal structure is destroyed, DJ-1 inhibition of ferroptosis is abolished.
PARK7	HGNC:16369	ENSG00000116288	DJ-1 suppresses ferroptosis through preserving the activity of S-adenosyl homocysteine hydrolase.
FXN	HGNC:3951	ENSG00000165060	Most importantly, frataxin deficiency enhanced ferroptosis driven by ethanol via evaluating the levels of lactate dehydrogenase, cell morphological changes, mitochondrial labile iron pool, and lipid peroxidation. Conversely, restoring frataxin alleviated the sensitivity to ferroptosis. In addition, frataxin overexpression mitigated the sensitivity of ethanol-induced ferroptosis in HepG2CYP2E1+/+.
FXN	HGNC:3951	ENSG00000165060	Suppression of FXN enhanced erastin-induced ferroptosis.
FXN	HGNC:3951	ENSG00000165060	FXN deficiency impairs thermogenesis and adipogenesis and increases susceptibility to ferroptosis in cultured adipocytes.
SUV39H1	HGNC:11479	ENSG00000101945	Mechanistically, we discovered that siRNA knockdown or pharmacological inhibition of SUV39H1 induced iron accumulation and lipid peroxidation, leading to ferroptosis that disrupted ccRCC cell growth in vitro and in vivo.
ACOT1	HGNC:33128	ENSG00000184227	Overexpression of Acot1 in cell lines showed noteworthy protection to ferroptosis, while the knock-down of Acot1 sensitized cardiomyocytes to ferroptosis by DIC.
CircIL4R	_NA_	_NA_	CircIL4R knockdown impeded oncogenesis and expedited ferroptosis of HCC cells.
CDH1	HGNC:1748	ENSG00000039068	CDH1 silencing or ZEB1 overexpression increased the susceptibility to ferroptosis, whereas CDH overexpression or ZEB1 silencing decreased the susceptibility, in vitro and in vivo.
CDH1	HGNC:1748	ENSG00000039068	These results indicate that the inhibition of E-cadherin or the induction of EMT enhance ferroptosis.
CDH1	HGNC:1748	ENSG00000039068	E-Cadherin Induced Cell Density-Dependent Inhibition of Ferroptosis.
NEDD4L	HGNC:7728	ENSG00000049759	Here, we screened 571 UPS-related E1, E2, and E3 genes in a human pancreatic cancer cell line (PANC1) and identified the upregulation of NEDD4-like E3 ubiquitin protein ligase (NEDD4L) as a novel ferroptosis suppressor.
BRD2	HGNC:1103	ENSG00000204256	Inhibition of BET and the proteasome triggers ferroptosis cell death.
BRD3	HGNC:1104	ENSG00000169925	Inhibition of BET and the proteasome triggers ferroptosis cell death.
DECR1	HGNC:2753	ENSG00000104325	Collectively, these results suggest that DECR1 expression protect cells from oxidative stress and that DECR1 knockdown-induced cell death is primarily mediated by induction of ferroptosis.
GLRX5	HGNC:20134	ENSG00000182512	Inhibition of GLRX5 promotes ferroptotic cell death of HNC cells.
NCOA3	HGNC:7670	ENSG00000124151	NCOA3 as a coactivator synergized with NR5A2 to prevent BETi induced ferroptosis.
NR5A2	HGNC:7984	ENSG00000116833	NCOA3 as a coactivator synergized with NR5A2 to prevent BETi induced ferroptosis.
RHEBP1	HGNC:10010	ENSG00000229927	Rheb1 protects against cisplatin-induced tubular cell death and acute kidney injury via maintaining mitochondrial homeostasis.
CP	HGNC:2295	ENSG00000047457	Ceruloplasmin suppresses ferroptosis by regulating iron homeostasis in hepatocellular carcinoma cells.
ARF6	HGNC:659	ENSG00000165527	Abrogation of ARF6 promotes RSL3-induced ferroptosis and mitigates gemcitabine resistance in pancreatic cancer cells.
ABHD12	HGNC:15868	ENSG00000100997	Blockade of the lysophosphatidylserine lipase ABHD12 potentiates ferroptosis in cancer cells.
TFAM	HGNC:11741	ENSG00000108064	Zalcitabine-induced TFAM degradation promotes ferroptosis.
KDM3B	HGNC:1337	ENSG00000120733	Overexpressed KDM3B prevents cells from Erastin-induced ferroptosis.
AHCY	HGNC:343	ENSG00000101444	Suppression of SAHH expression by RNA interference also promoted erastin-induced accumulation of lipid ROS (Fig. 5i, j), which phenocopied the DJ-1 KD effect.
circ-TTBK2	HGNC:19141	ENSG00000128881	Knockdown of circ-TTBK2 suppressed cell proliferation, invasion, and promoted ferroptosis in glioma cells.
MIR522	HGNC:32127	ENSG00000283685	CAFs secreted exo-miR-522 suppresses ferroptosis of GC cells.
IDH2	HGNC:5383	ENSG00000182054	Knockdown of IDH2 promotes ferroptosis in cells treated with erastin.
PPARA	HGNC:9232	ENSG00000186951	In the p53 KO derivatives of both HT-1080 and SK-Hep1 cells, increased PPAR伪 activity suppressed ferroptosis (Fig. 6C, D), while decreased PPAR伪 activity increased their sensitivity to ferroptosis (Fig. 6E,F).
NOS2	HGNC:7873	ENSG00000007171	Knockdown (KD) of iNOS caused increased sensitivity of M1 RAW 264.7 macrophages and EOC 20 cells to RSL3 induced death that was effectively suppressed by Fer-1.
VDR	HGNC:12679	ENSG00000111424	VDR activation attenuate cisplatin induced AKI by inhibiting ferroptosis.
NEDD4	HGNC:7727	ENSG00000069869	Nedd4 negatively regulates erastin-induced ferroptosis.
PRDX1	HGNC:9352	ENSG00000117450	Consistent with our previous observation, loss of PRDX1 was sufficient to induce a significant increase in lipid peroxidation (Fig. 3B).
MTF1	HGNC:7428	ENSG00000188786	Importantly, MTF1 silencing also abolished the ferroptosis protection phenotypes of ATM silencing (Fig. 5c).
NUPR1	HGNC:29990	ENSG00000176046	NUPR1 is a critical repressor of ferroptosis.
NEAT1	HGNC:30815	ENSG00000245532	NEAT1 knockdown and overexpression greatly increased and decreased cell death (TUNEL staining, p鈥?鈥?.05;Figure 2b, c), respectively, and affected MDA levels (p鈥?鈥?.05; Figure 2d) in A549 cells, further confirming the link between NEAT1 and ferroptosis induction.
PARP1	HGNC:270	ENSG00000143799	PARP inhibition promotes ferroptosis in ovarian cancer cells.
PARP2	HGNC:272	ENSG00000129484	PARP inhibition promotes ferroptosis in ovarian cancer cells.
PARP4	HGNC:271	ENSG00000102699	PARP inhibition promotes ferroptosis in ovarian cancer cells.
PARP8	HGNC:26124	ENSG00000151883	PARP inhibition promotes ferroptosis in ovarian cancer cells.
PARP9	HGNC:24118	ENSG00000138496	PARP inhibition promotes ferroptosis in ovarian cancer cells.
PARP10	HGNC:25895	ENSG00000178685	PARP inhibition promotes ferroptosis in ovarian cancer cells.
PARP11	HGNC:1186	ENSG00000111224	PARP inhibition promotes ferroptosis in ovarian cancer cells.
PARP12	HGNC:21919	ENSG00000059378	PARP inhibition promotes ferroptosis in ovarian cancer cells.
PARP14	HGNC:29232	ENSG00000173193	PARP inhibition promotes ferroptosis in ovarian cancer cells.
PARP15	HGNC:26876	ENSG00000173200	PARP inhibition promotes ferroptosis in ovarian cancer cells.
PARP16	HGNC:26040	ENSG00000138617	PARP inhibition promotes ferroptosis in ovarian cancer cells.
PDSS2	HGNC:23041	ENSG00000164494	PDSS2 Inhibits the Ferroptosis of Vascular Endothelial Cells in Atherosclerosis by Activating Nrf2.
TXN	HGNC:12435	ENSG00000136810	Our results suggest that Trx-1 inhibits ferroptosis in PD through regulating GPX4 and GSH.
SENP1	HGNC:17927	ENSG00000079387	SENP1 overexpression suppresses ferroptotic cell death of H9c2 cells.
OIP5-AS1	HGNC:43563	ENSG00000247556	LncRNA OIP5-AS1 inhibits ferroptosis in prostate cancer with long-term cadmium exposure through miR-128-3p/SLC7A11 signaling.
MIR190A	HGNC:31560	ENSG00000211137	miR-190a-5p inhibits ferroptosis induced by erastin and RSL3 in H9c2 cells.
CREB1	HGNC:2345	ENSG00000118260	CREB stimulates GPX4 transcription to inhibit ferroptosis in lung adenocarcinoma.
CREB3	HGNC:2347	ENSG00000107175	CREB stimulates GPX4 transcription to inhibit ferroptosis in lung adenocarcinoma.
CREB5	HGNC:16844	ENSG00000146592	CREB stimulates GPX4 transcription to inhibit ferroptosis in lung adenocarcinoma.
MIR130B	HGNC:31515	ENSG00000283871	miR-130b-3p suppresses erastin or RSL3-induced ferroptosis in melanoma cells.
BEX1	HGNC:1036	ENSG00000133169	Taken together, these findings demonstrate that BEX1 promotes cell survival in adrenal cells by mediating the inhibition of ferroptosis and suggest a function for BEX1 in the pathogenesis of APAs.
ASAH2	HGNC:18860	ENSG00000188611	Our data thus indicate the Asah2 represses Hmox1 expression to reduce lipid ROS to suppress ferroptosis.
TMSB4X	HGNC:11881	ENSG00000205542	Thymosin beta 4 alleviates non-alcoholic fatty liver by inhibiting ferroptosis via up-regulation of GPX4.
KIF20A	HGNC:9787	ENSG00000112984	High KIF20A expression in resistant CRC cell line suppressed the intracellular ferroptosis process.
circRHOT1	_NA_	_NA_	Circular RNA RHOT1 promotes progression and inhibits ferroptosis via mir-106a-5p/STAT3 axis in breast cancer.
MEG8	HGNC:14574	ENSG00000225746	Silencing lncRNA MEG8 inhibits the proliferation and induces the ferroptosis of HemECs.
VCP	HGNC:12666	ENSG00000165280	VCP relocalization limits mitochondrial activity, GSH depletion and ferroptosis during starvation in PC3 prostate cancer cells. Moreover, the addition of a VCP inhibitor, CB-5083, in starvation media prevented VCP relocalization and triggered ferroptotic cell death.
circ_0007142	_NA_	_NA_	After expression inhibition of circ_0007142, proliferation was reduced, while apoptosis and ferroptosis were facilitated in CRC cells.
RBMS1	HGNC:9907	ENSG00000153250	RBMS1 ablation inhibited the translation of SLC7A11, reduced SLC7A11-mediated cystine uptake, and promoted ferroptosis.
KDM4A	HGNC:22978	ENSG00000066135	KDM4A knockdown promotes ferroptosis in OS cells.
MGST1	HGNC:7061	ENSG00000008394	MGST1 inhibits ferroptosis in vivo.
circKIF4A	_NA_	_NA_	Circular RNA circKIF4A facilitates the malignant progression and suppresses ferroptosis by sponging miR-1231 and upregulating GPX4 in papillary thyroid cancer.
miR-7-5p	_NA_	_NA_	Knockdown of miR-7-5p Enhances Ferroptosis Signaling.
circ_0067934	_NA_	_NA_	Circular RNA Circ_0067934 Attenuates Ferroptosis of Thyroid Cancer Cells by miR-545-3p/SLC7A11 Signaling.
MPC1	HGNC:21606	ENSG00000060762	Taken together, our data suggested that MPC1 suppression increased vulnerability to ferroptosis in vivo.
CHMP1A	HGNC:8740	ENSG00000131165	Chmp1a knockdown enhances ferroptosis through increased iron accumulation.
CAMKK2	HGNC:1470	ENSG00000110931	Then we proved that CAMKK2 negatively regulated ferroptosis through the activation of NRF2 and the suppression of lipid peroxidation.
SRSF9	HGNC:10791	ENSG00000111786	Furthermore, we found that SRSF9 inhibition increased erastin-induced ferroptosis by downregulating GPX4 level.
SRSF9	HGNC:10791	ENSG00000111786	Knockdown of SFRS9 Inhibits Progression of Colorectal Cancer Through Triggering Ferroptosis Mediated by GPX4 Reduction.
MIR4443	HGNC:41830	ENSG00000265483	miR-4443 promotes cisplatin resistance by suppressing ferroptosis.
SIRT2	HGNC:10886	ENSG00000068903	SIRT2 inhibition exacerbates p53-mediated ferroptosis in mice following experimental traumatic brain injury.
circRNA1615	_NA_	_NA_	circRNA1615 inhibits ferroptosis via modulation of autophagy by the miRNA152-3p/LRP6 molecular axis in cardiomyocytes of myocardial infarction.
MIR27A	HGNC:31613	ENSG00000207808	Cell viability was reduced after downregulating miR-27a-3p in comparison with control (Figure 5A), suggesting that miR-27a-3p negatively modulated ferroptosis.
MIR670	HGNC:37304	ENSG00000211568	MicroRNA-670-3p suppresses ferroptosis of human glioblastoma cells through targeting ACSL4.
MEF2C	HGNC:6996	ENSG00000081189	MEF2C Inhibited Ferroptosis by Upregulating NF2 and E-Cadherin.
EZH2	HGNC:3527	ENSG00000106462	Overexpression of EZH2 and SLC7A11 inhibits erastin-induced ferroptosis in TSCC cells.
PEDS1	HGNC:16735	ENSG00000240849	TMEM189 promotes ferroptosis resistance via inhibiting expression of FAR1 through plasmalogen synthesis.
ADAMTS13	HGNC:1366	ENSG00000160323	We found that ADAMTS13 alleviated CP-induced ferroptosis in AKI mice with renal function impairment and tubular damage.
CDC25A	HGNC:1725	ENSG00000164045	Overexpression of Cdc25A suppressed ferroptosis in cervical cancer cells.
CircFNDC3B	_NA_	_NA_	CircFNDC3B Represses Ferroptosis of OSCC Cells by Inducing SLC7A11 Expression.
PPARD	HGNC:9235	ENSG00000112033	GW501516-activated PPAR未 attenuates ferroptotic death of xCT-deficient MEFs.
LCN2	HGNC:6526	ENSG00000148346	LIFR and SHP1 positively regulate ferroptosis while LCN2 negatively regulates ferroptosis.
LCN2	HGNC:6526	ENSG00000148346	hLcn-2 Protects Renal Tumor Cells against Erastin-Induced Ferroptotic Cell Death.
LCN2	HGNC:6526	ENSG00000148346	Lipocalin 2 expression promotes tumor progression and therapy resistance by inhibiting ferroptosis in colorectal cancer.
MARCHF5	HGNC:26025	ENSG00000198060	Further, in cultured cardiomyocytes stressed with DOX, both MITOL and GPX4 were reduced, whereas forced-expression of MITOL suppressed DOX-induced ferroptosis by maintaining GPX4 content.
DHODH	HGNC:2867	ENSG00000102967	DHODH inhibits mitochondrial ferroptosis.
MIR545	HGNC:32531	ENSG00000207820	These data suggest that miR-545 may increase CRC cell survival by inhibiting ferroptosis.
CircPVT1	_NA_	_NA_	Furthermore, knockdown of circPVT1 increased ferroptosis through downregulating p-尾-catenin, GPX4, and SLC7A11 while miR-30a-5p inhibition and FZD3 overexpression reversed the phenotype by upregulating p-尾-catenin, GPX4, and SLC7A11.
MIR9-3HG	HGNC:27388	ENSG00000255571	BMSCs-Exo Mir9-3hg attenuates H/R-induced ferroptosis in HL-1 cells.
ADIPOQ	HGNC:13633	ENSG00000181092	ADPN inhibited oxidation/peroxide imbalance-induced ferroptosis in placental tissues of GDM mice.
circDTL	_NA_	_NA_	Inhibition of circDTL Induced Apoptosis and Ferroptosis in NSCLC Cells.
mmu_circRNA_0000309	_NA_	_NA_	mmu_circRNA_0000309 depletion abrogates the inhibitory effect of germacrone on ferroptosis.
ABCC5	HGNC:56	ENSG00000114770	ABCC5 increased intracellular glutathione (GSH) and attenuated lipid peroxidation accumulation by stabilizing SLC7A11 protein, which inhibited ferroptosis.
CISD3	HGNC:27578	ENSG00000277972	CISD3 inhibition drives cystine-deprivation induced ferroptosis.
circRHBG	_NA_	_NA_	circRHBG inhibits ferroptosis in PCOS cells through the circRHBG/miR-515-5p/SLC7A11 axis in PCOS.
LINC01833	HGNC:52644	ENSG00000259439	LncRNA RP11-89 facilitates tumorigenesis and ferroptosis resistance through PROM2-activated iron export by sponging miR-129-5p in bladder cancer.
circGFRA1	_NA_	_NA_	Downregulation of circGFRA1 promotes ferroptosis in HER鈥?鈥恜ositive BC.
MAPKAP1	HGNC:18752	ENSG00000119487	mTORC2 ablation induces ferroptosis in memory CD4+ T cells.
RICTOR	HGNC:28611	ENSG00000164327	mTORC2 ablation induces ferroptosis in memory CD4+ T cells.
circ0097009	_NA_	_NA_	Knockdown of circ0097009 promotes ferroptosis in HCC.
TMEM161B-DT	HGNC:43839	ENSG00000247828	Knockdown of TMEM161B-AS1 down-regulated the expression of FANCD2 and CD44 by sponging hsa-miR-27a-3p, inhibited the proliferation, migration, invasion and promoted apoptosis, ferroptosis of U87 cells and U251 cells.
circEPSTI1	_NA_	_NA_	Silencing of circEPSTI1 induces ferroptosis mediated by SLC7A11.
MIR18A	HGNC:31548	ENSG00000283815	miR-18a promotes glioblastoma development by down-regulating ALOXE3-mediated ferroptotic and anti-migration activities. miR-18a directly targets ALOXE3 and suppresses its expression in GBM cells.
ENPP2	HGNC:3357	ENSG00000136960	Overexpression modestly promotes migration and proliferation and significantly inhibits erastin-induced ferroptosis.
ENPP2	HGNC:3357	ENSG00000136960	These data suggested the inhibitory effects of ENPP2 on DOX-induced ferroptosis in H9c2 cells.
FABP4	HGNC:3559	ENSG00000170323	Mechanistically, SCD1 leads to fatty acid (FA) desaturation and FABP4 derived from TEM enhances lipid droplet (LD) in cancer cells, which cooperatively protect from oxidative stress-induced ferroptosis.
RARRES2	HGNC:9868	ENSG00000106538	Chemerin inhibition increases oxidized lipid and enhances ferroptosis susceptibility.
GDF15	HGNC:30142	ENSG00000130513	GDF15 knockdown promotes erastin-induced ferroptosis by decreasing SLC7A11 expression.
PIR	HGNC:30048	ENSG00000087842	Consequently, in cell cultures and xenograft mouse models, blocking PIR signaling enhances ferroptosis-mediated tumor growth suppression.
AR	HGNC:644	ENSG00000169083	Furthermore, overexpression of AR prevented ferroptosis in the presence of GPX4.
PROK2	HGNC:18455	ENSG00000163421	Thus, Prok2 overexpression alleviates ferroptosis by promoting expression of Fbxo10 and accelerating Acsl4 ubiquitination/degradation.
PLA2G6	HGNC:9039	ENSG00000184381	PLA2G6 Deficiency Sensitizes Trophoblasts to Ferroptosis.
PLA2G6	HGNC:9039	ENSG00000184381	These results demonstrate that iPLA2尾 acts as a major ferroptosis repressor in a GPX4-independent manner.
PLA2G6	HGNC:9039	ENSG00000184381	Phospholipase iPLA2尾 Averts Ferroptosis By Eliminating A Redox Lipid Death Signal.
MTOR	HGNC:3942	ENSG00000198793	Necessary and sufficient to protect cardiomyocyte cells against ferroptotic cell death. mTOR overexpression suppressed ferroptotic cell death, whereas mTOR deletion exaggerated cell death.
MTOR	HGNC:3942	ENSG00000198793	MTOR inhibitor induces GPX4 protein degradation. Interplay between MTOR and GPX4 signaling modulates autophagy dependent ferroptotic cancer cell death.
MTOR	HGNC:3942	ENSG00000198793	mTORC1 inhibition sensitizes cancer cells or tumors to ferroptosis.
MTOR	HGNC:3942	ENSG00000198793	mTORC2 ablation induces ferroptosis in memory CD4+ T cells.
AKT1S1	HGNC:28426	ENSG00000204673	mTORC1 inhibition sensitizes cancer cells or tumors to ferroptosis.
KLHDC3	HGNC:20704	ENSG00000124702	KLHDC3 suppresses ferroptosis in a p14ARF and SLC7A11-dependent manner.
PML	HGNC:9113	ENSG00000140464	PML expression turned cells highly resistant to ferroptosis.
P4HB	HGNC:8548	ENSG00000185624	Knockdown of these target genes sensitized cells to known ferroptosis inducers, while PACMA31, a previously reported inhibitor of P4HB, directly induced ferroptosis and was highly synergistic with erastin.
TYRO3	HGNC:12446	ENSG00000092445	Inhibition of TYRO3 enhances ferroptosis and sensitizes resistant tumors to anti-mPD-1 therapy.
TP53	HGNC:11998	ENSG00000141510	Inhibits ferroptosis in human colorectal cancer (CRC) cells. Loss of TP53 restored erastin sensitivity. Inhibits cell death induction by erastin in human CRC cells.
TP53	HGNC:11998	ENSG00000141510	p53 stabilization suppresses ferroptosis. p53 suppresses metabolic stress-induced ferroptosis.
OTUB1	HGNC:23077	ENSG00000167770	Inactivation promotes ferroptosis by down-regulating SLC7A11 levels. Overexpression is critical for tumor growth.
OTUB1	HGNC:23077	ENSG00000167770	OTUB1 knockdown triggers ferroptosis dependent on SLC7A11 expression.
PARP3	HGNC:273	ENSG00000041880	PARP inhibition promotes ferroptosis in ovarian cancer cells.
SIRT3	HGNC:14931	ENSG00000142082	These data indicate that inactivation of Sirt3 significantly sensitizes cells to p53-dependent ferroptosis upon ROS-induced stress.
ETV4	HGNC:3493	ENSG00000175832	Overall, the data suggested that the knockdown of ETV4 suppressed the PTC progression by promoting ferroptosis upon SLC7A11 downregulation.
SIRT6	HGNC:14934	ENSG00000077463	SIRT6 silencing overcomes resistance to sorafenib by promoting ferroptosis in gastric cancer.
SREBF2	HGNC:11290	ENSG00000198911	The lipogenesis regulator SREBP2 directly induces transcription of the iron carrier Transferrin (TF), reducing intracellular iron pools, reactive oxygen species, and lipid peroxidation, thereby conferring resistance to inducers of ferroptosis.
FGF21	HGNC:3678	ENSG00000105550	FGF21 attenuates ferroptosis by promoting HO-1 ubiquitination and degradation.
G6PD	HGNC:4057	ENSG00000160211	G6PD inhibits ferroptosis in HCC cells.
RPTOR	HGNC:30287	ENSG00000141564	mTORC1, Instead of mTORC2, Suppresses Ferroptosis. short-hairpin RNA (shRNA)-mediated silencing of RAPTOR (a component of mTORC1) but not that of RICTOR (a component of mTORC2) sensitized MDA-MB-453 and BT474 cells to RSL3.
RPTOR	HGNC:30287	ENSG00000141564	mTORC1 inhibition sensitizes cancer cells or tumors to ferroptosis.
ECH1	HGNC:3149	ENSG00000104823	Enoyl coenzyme A hydratase 1 alleviates nonalcoholic steatohepatitis in mice by suppressing hepatic ferroptosis.
NFS1	HGNC:15910	ENSG00000244005	Suppression of NFS1 cooperates with inhibition of cysteine transport to trigger ferroptosis in vitro and slow tumour growth. Suppression of NFS1 predisposes cancer cells to ferroptosis.
ALDH3A2	HGNC:403	ENSG00000072210	Thus, our results show that loss of Aldh3a2 induces ferroptotic cell death in leukemic cells and is synthetically lethal with GPX4 inhibtion.
USP35	HGNC:20061	ENSG00000118369	USP35 knockdown promotes ferroptosis in lung cancer cells.
FURIN	HGNC:8568	ENSG00000140564	Furin protects epithelial cells from DSS-induced ferroptosis-like cell injury and alleviates experimental colitis by activating the Nrf2-Gpx4 signaling pathway.
MLST8	HGNC:24825	ENSG00000167965	mTORC1 inhibition sensitizes cancer cells or tumors to ferroptosis.
MLST8	HGNC:24825	ENSG00000167965	mTORC2 ablation induces ferroptosis in memory CD4+ T cells.
SESN2	HGNC:20746	ENSG00000130766	Has cytoprotective effect against ferroptosis. In cells expressing Sesn2, erastin-induced cell death, ROS formation, and glutathione depletion were almost completely inhibited compared to that in control cells.
SESN2	HGNC:20746	ENSG00000130766	Sesn2 suppresses septic-induced ferroptosis to improve the immune function of DCs.
TMSB4Y	HGNC:11882	ENSG00000154620	Thymosin beta 4 alleviates non-alcoholic fatty liver by inhibiting ferroptosis via up-regulation of GPX4.
GALNT14	HGNC:22946	ENSG00000158089	Altogether, GALNT14 is involved in the ferroptosis of ovarian cancer cells, and downregulation of GALNT14 can trigger ferroptosis in ovarian cancer cells.
COPZ1	HGNC:2243	ENSG00000111481	Knockdown of COPZ1 causes ferroptosis in GBM cells.
AKR1C1	HGNC:384	ENSG00000187134	Up-regulated in DU-145 erastin-resistant clones. Participate in the detoxification of toxic lipid metabolites. May confer partial resistance to erastin by enhancing the detoxification of reactive aldehydes generated downstream of the oxidative destruction of the plasma membrane during ferroptosis.
AKR1C1	HGNC:384	ENSG00000187134	Inhibition completely resensitizes resistant melanoma cells to ferroptosis execution.
STK11	HGNC:11389	ENSG00000118046	Loss of function of the tumor suppressor LKB1 enhances sensitivity to ferroptosis in human non-small cell lung cancer cells.
TFAP2A	HGNC:11742	ENSG00000137203	TFAP2A Inhibition Promotes Ferroptosis.
ATF2	HGNC:784	ENSG00000115966	All these results suggested that ATF2 inhibited BETi-induced ferroptosis by increasing NRF2 expression.
PTPN18	HGNC:9649	ENSG00000072135	In the present study, we found that silencing of PTPN18 induced ferroptosis in KLE endometrial cancer cells.
NF2	HGNC:7773	ENSG00000186575	Genetic inactivation of NF2 rendered cancer cells more sensitive to ferroptosis. Mediates cell density-dependent inhibition of ferroptosis.
NF2	HGNC:7773	ENSG00000186575	Together, these results suggest that loss of NF2 might sensitize meningioma to ferroptosis-induced cytotoxicity.
FADS2	HGNC:3575	ENSG00000134824	Depletion of the SCD1 and FADS2 metabolic genes induces ferroptosis.
CA9	HGNC:1383	ENSG00000107159	Inhibition induces ferroptosis.
FTH1	HGNC:3976	ENSG00000167996	Knockdown of p62, quinone oxidoreductase鈥?, heme oxygenase鈥?, and ferritin heavy chain鈥? by RNA interference in HCC cells promoted ferroptosis in response to erastin and sorafenib.
FTH1	HGNC:3976	ENSG00000167996	FTH reconstituted cells exhibited the reduced lipid peroxides content and restored the DHA-induced ferroptosis.
FTH1	HGNC:3976	ENSG00000167996	FTH1 Inhibits Ferroptosis Through Ferritinophagy in the 6-OHDA Model of Parkinson's Disease.
FTH1	HGNC:3976	ENSG00000167996	FTH expression endows HCC cells specifically resistant to ferroptosis.
FTH1	HGNC:3976	ENSG00000167996	Meanwhile, we also showed that apoferritin prevented MPTP-induced ferroptosis effectively by inhibiting the up-regulation of long-chain acyl-CoA synthetase 4 (ACSL4) and the down-regulation of ferroptosis suppressor protein 1 (FSP1).
PROM2	HGNC:20685	ENSG00000155066	Induced by ferroptotic stress and promotes resistance to ferroptotic cell death. Facilitates ferroptosis resistance in mammary epithelial and breast carcinoma cells.
PROM2	HGNC:20685	ENSG00000155066	Together, these data indicate that cells can resist ferroptosis by activating p38 and, consequently, inducing prominin2.
PARP6	HGNC:26921	ENSG00000137817	PARP inhibition promotes ferroptosis in ovarian cancer cells.
HSPB1	HGNC:5246	ENSG00000106211	Knockdown of HSF1 and HSPB1 enhances erastin-induced ferroptosis, whereas heat shock pretreatment and overexpression of HSPB1 inhibits erastin-induced ferroptosis.
HSPB1	HGNC:5246	ENSG00000106211	HSP27 protects against ferroptosis of glioblastoma cells.
FANCD2	HGNC:3585	ENSG00000144554	Inhibits erastin-induced ferroptosis. Plays a novel role in the negative regulation of ferroptosis.
PDK4	HGNC:8812	ENSG00000004799	PDK4 inhibits ferroptosis by blocking pyruvate dehydrogenase-dependent pyruvate oxidation.

## Sheet: 38-Up-genes
symbol	hgncid	ensgstable	function
TERT	HGNC:11730	ENSG00000164362	In contrast, TERT-overexpressing cells exhibited marked elevation in SLC7A11 levels and thereby inhibited ferroptosis.
PANX2	HGNC:8600	ENSG00000073150	PANX2 Silencing Promotes Ferroptosis in PCa Cells.
CDKN1A	HGNC:1784	ENSG00000124762	Required to to suppress ferroptosis.
CDKN1A	HGNC:1784	ENSG00000124762	While this study was performed in cancer cell lines, our results support the potential of p21 to aid in maintenance of healthy tissues by blocking the damage incurred due to ferroptosis.
NR1D1	HGNC:7962	ENSG00000126368	Targeted inhibition of Rev-erb- limits ferroptosis to ameliorate folic acid-induced AKI in mice.
NR1D1	HGNC:7962	ENSG00000126368	Kidney-specific loss of Rev-erb attenuates AAI-induced ferroptosis and renal injury in mice.
MAP1LC3A	HGNC:6838	ENSG00000101460	Potential positive regulators of ferroptosis.
BRDT	HGNC:1105	ENSG00000137948	Inhibition of BET and the proteasome triggers ferroptosis cell death.
SMG9	HGNC:25763	ENSG00000105771	SMG9 drives ferroptosis by directly inhibiting GPX4 degradation.
EPAS1	HGNC:3374	ENSG00000116016	A driver of ferroptosis susceptibility. Ablation reduced susceptibility to ferroptosis.
EPAS1	HGNC:3374	ENSG00000116016	D-mannose-induced downregulation of HIF-2 inhibits OA progression through suppressing chondrocyte ferroptosis.
TTPA	HGNC:12404	ENSG00000137561	_NA_
TRIB2	HGNC:30809	ENSG00000071575	Here, we demonstrated that deletion of TRIB2 sensitized ferroptosis via lifting labile iron in liver cancer cells.
BAP1	HGNC:950	ENSG00000163930	Suppresses SLC7A11-mediated cystine uptake and promotes ferroptosis. BAP1 mutants lose their abilities to repress SLC7A11 and to promote ferroptosis.
BAP1	HGNC:950	ENSG00000163930	Promotes ferroptosis induced by class I ferroptosis inducer.
DUOX1	HGNC:3062	ENSG00000137857	Suppresses erastin-induced ferroptosis when inhibited by inhibitor.
MT1G	HGNC:7399	ENSG00000125144	A negative regulator of ferroptosis in HCC cells. Knockdown of MT鈥?G by RNA interference increases glutathione depletion and lipid peroxidation, which contributes to sorafenib鈥恑nduced ferroptosis.
SOX2	HGNC:11195	ENSG00000181449	Stem Cell Factor SOX2 Confers Ferroptosis Resistance in Lung Cancer via Upregulation of SLC7A11.
CYGB	HGNC:16505	ENSG00000161544	CYGB improved lipid oxidation and increased sensitivity to ferroptosis.
HSF1	HGNC:5224	ENSG00000185122	Knockdown of HSF1 and HSPB1 enhances erastin-induced ferroptosis, whereas heat shock pretreatment and overexpression of HSPB1 inhibits erastin-induced ferroptosis.
HSF1	HGNC:5224	ENSG00000185122	Altogether, HSF1 may function as a key defender against PA-induced ferroptosis in cardiomyocytes by maintaining cellular iron homeostasis and GPX4 expression.
HSF1	HGNC:5224	ENSG00000185122	HSF1 inhibition sensitizes cancer cells to ferroptotic cell death.
TF	HGNC:11740	ENSG00000091513	Essential for the induction of ferroptotic cell death. Transferrin can only interact with transferrin receptor and be transported into the cell when it is loaded with iron.
TF	HGNC:11740	ENSG00000091513	Involved in siramesine and lapatinib-induced ferroptotic cell death. Increased following treatment with lapatinib alone or in combination with siramesine. Knocking down of transferrin resulted in decreased cell death and ROS after treatment.
TF	HGNC:11740	ENSG00000091513	Trf-LKO mice display iron-deficiency anemia, iron overload in tissues, and susceptibility to liver damage via ferroptosis.
KDM6B	HGNC:29012	ENSG00000132510	JMJD3 deficiency alleviates lipopolysaccharidenduced acute lung injury by inhibiting alveolar epithelial ferroptosis in a Nrf2ependent manner.
FNDC5	HGNC:20240	ENSG00000160097	Serum irisin levels are decreased and negatively correlated with disease severity in patients with sepsis, and irisin treatment suppresses ferroptosis and restores mitochondrial function in experimental sepsis.
SIAH2	HGNC:10858	ENSG00000181788	Additionally SIAH2-deficient cells are also characterized by reduced expression levels of glutathione peroxidase 4 (GPX4), rendering the knock-out cells more sensitive to ferroptosis.
MYCN	HGNC:7559	ENSG00000134323	MYCN confers cell sensitivity to ferroptosis upon GPX4 inhibition.
GSTM1	HGNC:4632	ENSG00000134184	Moreover, the results suggest that GSTM1 may be a novel negative regulator of ferroptosis in addition to GPX4.
PRR5	HGNC:31682	ENSG00000186654	mTORC2 ablation induces ferroptosis in memory CD4+ T cells.
PLIN2	HGNC:248	ENSG00000147872	An indispensable gene and protein in the suppression of ferroptosis caused by abnormal lipometabolism in gastric carcinoma.
SLC1A5	HGNC:10943	ENSG00000105281	Pharmacological inhibition by L-g-glutamyl-p-nitroanilide or RNAi knockdown markedly blocked ferroptosis.
SLC1A5	HGNC:10943	ENSG00000105281	Overexpression of SLC1A5 restored miR-137-mediated ferroptosis suppression.
SQSTM1	HGNC:11280	ENSG00000161011	The interaction between p62 and Keap1 increased following erastin and sorafenib treatment. Knockdown of p62 suppressed NRF2 expression and promoted growth inhibition with increased ferroptotic events including GSH depletion, lipid ROS production, and an increase of iron levels.
SQSTM1	HGNC:11280	ENSG00000161011	Inhibition of the p62 gene significantly reduced cell viability and increased cellular lipid ROS levels in HN3R cells; this was reversed by treatment with ferrostatin-1, a ferroptosis inducer.
SQSTM1	HGNC:11280	ENSG00000161011	Taken together, our results indicated that high p62 expression protects SH-SY5Y cells against 6-OHDA-induced ferroptosis.
KDM5C	HGNC:11114	ENSG00000126012	KDM5C suppresses tumorigenicity largely by promoting ferroptosis.
PPP1R13L	HGNC:18838	ENSG00000104881	iASPP overexpression inhibits ferroptosis, and iASPP knockdown promotes ferroptosis in vivo.
IFNA1	HGNC:5417	ENSG00000197919	Together, our results demonstrate that the autoantibodies and the increased IFN-伪 in SLE sera downregulate the expression of GPX4 and lead to neutrophil ferroptosis.
BCAT2	HGNC:977	ENSG00000105552	Here, by using a high-throughput CRISPR/Cas9-based genetic screen in HepG2 hepatocellular carcinoma cells to search for metabolic proteins inhibiting ferroptosis, we identified a branched-chain amino acid aminotransferase 2 (BCAT2) as a novel suppressor of ferroptosis.
TP63	HGNC:15979	ENSG00000073282	Delta Np63 alpha can inhibit ferroptosis independent of p53. Overexpression protects cells from ferroptosis-inducing agents.
ALOX5	HGNC:435	ENSG00000012779	The 5-Lipoxygenase inhibitor zileuton protected HT22 neuronal cells from erastin-induced ferroptosis.
ALOX5	HGNC:435	ENSG00000012779	Silencing ALOX genes made cells resistant to ferroptosis.
KMT2D	HGNC:7133	ENSG00000167548	Mll4 deficiency impairs ferroptosis via rewired gene expression.
RELA	HGNC:9955	ENSG00000173039	Deficiency of IEC NF-Bp65 led to upregulated ER stress-mediated ferroptosis in colitis
IFNA16	HGNC:5421	ENSG00000147885	Together, our results demonstrate that the autoantibodies and the increased IFN-伪 in SLE sera downregulate the expression of GPX4 and lead to neutrophil ferroptosis.
POM121L12	HGNC:25369	ENSG00000221900	_NA_
MS4A15	HGNC:28573	ENSG00000166961	Ms4a15 expression specifically blocks ferroptosis.
ENO3	HGNC:3354	ENSG00000108515	In addition, overexpressed ENO3 attenuated the status of ferroptosis.

## Sheet: 3-down-regulated genes
symbol	hgncid	ensgstable	function
ATG7	HGNC:16935	ENSG00000197548	Knockout or knockdown limited erastin-induced ferroptosis.
SLC39A7	HGNC:4927	ENSG00000112473	The genetic and chemical inhibition of ZIP7 protect cells against ferroptosis.
ACADSB	HGNC:91	ENSG00000196177	Overexpression of ACADSB inhibits CRC cell migration, invasion, and proliferation, while ACADSB knockdown has the opposite effect. More importantly, the study finds that ACADSB negatively regulates expression of glutathione reductase and glutathione peroxidase 4, the two main enzymes responsible for clearing glutathione (GSH) in CRC cells.
